# Supplementary material for: Synthesis and characterization of a bimetallic americium(iii) pyrithionate coordination complex
Source: Royal Society of Chemistry journal article supplement (doi:10.1039/d2cc03352f), 2022-01-01
Supplement: d2cc03352f1.pdf [file d2cc03352f1.pdf]

# Synthesis and characterization of a bimetallic americium(III) pyrithionate coordination complex

Zachary K. Huffman,<sup>a</sup> Joseph M. Sperling,<sup>a</sup> Cory J. Windorff,<sup>a,b</sup> Brian N. Long,<sup>a</sup> Lucas  
Cordova,<sup>a</sup> Harry Ramanantoanina,<sup>c</sup> Cristian Celis-Barros,<sup>\*a</sup> Thomas E. Albrecht-Schönzart<sup>\*a</sup>

<sup>a</sup> Department of Chemistry and Biochemistry, Florida State University, 95 Chieftan Way, Tallahassee, Florida  
32306, United States

<sup>b</sup> Department of Chemistry and Biochemistry, New Mexico State University, MSC 3C, PO Box 3001, Las Cruces,  
New Mexico 88003, United States

<sup>c</sup> Karlsruhe Institute of Technology, Institute for Nuclear Waste Disposal (INE), P.O. Box 3640, D-76021 Karlsruhe,  
Germany

## Electronic Supplementary Information

### Tables of Contents

- Methods and general synthesis of **1-Am**, **1-Ln**, and **2-Ln**, Pages 3-7
- Supplementary Results and Discussion
  - Spectroscopy of **1-Ln** and **2-Ln**, Pages 6, 8-12
  - Bonding of **1-Am**, **1-Eu**, and **1-Nd**, Pages 5-7
- Crystallographic data of **1-Ln**, **2-Ln**, and **1-Am**, Pages 15-34
- <sup>1</sup>H NMR spectra of free pyrithione ligand, **1-Ln**, and **2-Ln**, Pages 35-41
- BI tables, NLMO diagrams, other theoretical analysis of **1-Am** and **1-Nd**, Pages 42-47
- CHN Analysis of **1-Ln** and **2-Ln**, Pages 48-60
- References, Page 61

## Methods

### Experimental

**Considerations.** CAUTION!  $^{243}\text{Am}$  ( $t_{1/2} = 7370$  years) is an  $\alpha$ -particle emitting radioisotope that is hazardous to human health. Furthermore, the primary daughter isotope ( $^{239}\text{Np}$ ) is a strong  $\gamma$ -ray emitter with high specific activity. All sample manipulations were conducted on an appropriately sized scale in a specially designated laboratory equipped with HEPA filtration.

**Materials.** All synthetic procedures were carried out in air with no attempt to exclude air or water in a well-ventilated fume hood in ambient conditions. The following solvents and chemicals were purchased reagent grade from commercial sources and used as received: HCl (concentrated, 37%, Sigma),  $\text{HNO}_3$  (concentrated,  $\geq 90\%$ , Sigma),  $\text{NH}_3(\text{aq})$  (concentrated, 28-30%, Sigma), Na(mpo) (Sigma-Aldrich,  $\geq 96\%$ ). Deionized water was obtained from an in-house system.  $\text{LnCl}_3 \cdot 6\text{H}_2\text{O}$  and  $\text{Ln}(\text{NO}_3)_3 \cdot 6\text{H}_2\text{O}$  were prepared by dissolution of  $\text{Ln}_2\text{O}_3$  (Sigma-Aldrich, Strem) in concentrated acid (Sigma-Aldrich), evaporation to dryness, washing with diethyl ether ( $\geq 99.0\%$ , Sigma-Aldrich), and drying under house vacuum for 12 hours.

**Instrumentation.** Solid-state UV-vis-NIR spectra of single crystals were collected using a CRAIC Technologies UV-vis-NIR microspectrophotometer with a mercury light source. Single crystals were isolated on glass slides using Parabar 10312 immersion oil and data were collected from 350 to 1000 nm at room temperature.

Crystallographic diffraction data were collected by mounting single crystals on a MITOGEN MicroLoop LD and aligning with a digital camera on a Bruker D8 Quest X-ray diffractometer. Collections used Mo  $K\alpha$  X-rays ( $\lambda = 0.71073 \text{ \AA}$ ) from an  $I\mu\text{S}$  X-ray source and collection strategies were calculated using the APEX III software.<sup>1</sup> Structures were solved using intrinsic phasing methods (SHELXT) and refined by least squares techniques (SHELXL) in the OLEX2 program.<sup>2,3</sup> Crystallographic data and parameters can be found below.

### Synthesis.

General Synthesis of  $[\text{Am}(\text{mpo})_2(\mu\text{-O-mpo})(\text{H}_2\text{O})]_2 \cdot 3\text{H}_2\text{O}$ , **1-Am**. An aliquot of  $^{243}\text{Am}$  (5 mg of  $^{243}\text{Am}$  content, 0.021 mmol) in 2 M HCl was reacted with excess  $\text{NH}_3(\text{aq})$  until a pale-yellow solid precipitated out of solution. Credulously identified as " $\text{Am}(\text{OH})_3$ ," the precipitate was washed with DI water ( $2 \times 3 \text{ mL}$ ) before being suspended in water (1 mL) and redissolved with concentrated HCl (1 mL). The resulting yellow solution was diluted to 5 mL with water and combined with Na(mpo) (10 mg, 0.067 mmol) dissolved in water (2.0 mL). Slow evaporation of the resulting solution over a period of 48 hours resulted in X-ray-quality crystals which were suitable for data collection. Due to radiological constraints, a final yield could not be determined.

General Synthesis of  $[\text{Ln}(\text{mpo})_2(\mu\text{-O-mpo})(\text{H}_2\text{O})]_2$ , **1-Ln** (Ln = La, Pr, Nd, Sm, Eu, Gd, Tb):  $\text{LnCl}_3 \cdot 6\text{H}_2\text{O}$  (0.055 mmol) or  $\text{Ln}(\text{NO}_3)_3 \cdot 5\text{H}_2\text{O}$  (0.055 mmol) in water (1.0 mL) was combined with Na(mpo) (25 mg, 0.17 mmol). Slow evaporation of the solution over a period of 24 hours

resulted in X-ray-quality crystals which were washed ( $2 \times 3\text{mL}$ ) with DI water followed by ( $2 \times 3\text{mL}$ ) diethyl ether prior to data collection.

### **1-[La(mpo)<sub>2</sub>( $\mu$ -O-mpo)(H<sub>2</sub>O)]<sub>2</sub>**

When LaCl<sub>3</sub>•6H<sub>2</sub>O (18 mg) or La(NO<sub>3</sub>)<sub>3</sub>•5(H<sub>2</sub>O) (22 mg) was used, 1-[La(mpo)<sub>2</sub>( $\mu$ -O-mpo)(H<sub>2</sub>O)]<sub>2</sub> was isolated as colorless crystals (yield 26 mg, 88%).

### **1-[Pr(mpo)<sub>2</sub>( $\mu$ -O-mpo)(H<sub>2</sub>O)]<sub>2</sub>**

When PrCl<sub>3</sub>•6H<sub>2</sub>O (19 mg) or Pr(NO<sub>3</sub>)<sub>3</sub>•5(H<sub>2</sub>O) (23 mg) was used, 1-[Pr(mpo)<sub>2</sub>( $\mu$ -O-mpo)(H<sub>2</sub>O)]<sub>2</sub> was isolated as green crystals (yield 25 mg, 87%). UV/vis/NIR [ $\lambda_{\text{max}}$ , nm, single crystal]: 452.9 <sup>3</sup>P<sub>2</sub>, 471.5 <sup>3</sup>P<sub>1</sub>, 489.4 <sup>3</sup>P<sub>0</sub>, 598.1 <sup>1</sup>D<sub>2</sub>.

### **1-[Nd(mpo)<sub>2</sub>( $\mu$ -O-mpo)(H<sub>2</sub>O)]<sub>2</sub>**

When NdCl<sub>3</sub>•6H<sub>2</sub>O (19 mg) or Nd(NO<sub>3</sub>)<sub>3</sub>•5(H<sub>2</sub>O) (23 mg) was used, 1-[Nd(mpo)<sub>2</sub>( $\mu$ -O-mpo)(H<sub>2</sub>O)]<sub>2</sub> was isolated as blue crystals (yield 26 mg, 88%). UV/vis/NIR [ $\lambda_{\text{max}}$ , nm, single crystal]: 431.0 <sup>2</sup>P<sub>1/2</sub>, 529.7 <sup>4</sup>G<sub>7/2</sub>, 589.7, 597.3 – both excitations are <sup>4</sup>G<sub>5/2</sub> or <sup>4</sup>G<sub>7/2</sub>, 685.4 <sup>4</sup>F<sub>9/2</sub>, 738.4, 748.2, 758.7 – all excitations are <sup>4</sup>F<sub>7/2</sub> or <sup>4</sup>S<sub>3/2</sub>, 802.8, 806.5 – both excitations are <sup>2</sup>H<sub>9/2</sub> or <sup>4</sup>S<sub>3/2</sub>, 868.0 <sup>4</sup>F<sub>3/2</sub>.

### **1-[Sm(mpo)<sub>2</sub>( $\mu$ -O-mpo)(H<sub>2</sub>O)]<sub>2</sub>**

When SmCl<sub>3</sub>•6H<sub>2</sub>O (20 mg) or Sm(NO<sub>3</sub>)<sub>3</sub>•5(H<sub>2</sub>O) (23 mg) was used, 1-[Sm(mpo)<sub>2</sub>( $\mu$ -O-mpo)(H<sub>2</sub>O)]<sub>2</sub> was isolated as colorless crystals (yield 25 mg, 84%). UV/vis/NIR [ $\lambda_{\text{max}}$ , nm, single crystal]: 407.6 <sup>6</sup>P<sub>3/2</sub>, 423.2 – excitation is <sup>4</sup>F<sub>7/2</sub> or <sup>4</sup>L<sub>13/2</sub>.

### **1-[Eu(mpo)<sub>2</sub>( $\mu$ -O-mpo)(H<sub>2</sub>O)]<sub>2</sub>**

When EuCl<sub>3</sub>•6H<sub>2</sub>O (20 mg) or Eu(NO<sub>3</sub>)<sub>3</sub>•5(H<sub>2</sub>O) (24 mg) was used, 1-[Eu(mpo)<sub>2</sub>( $\mu$ -O-mpo)(H<sub>2</sub>O)]<sub>2</sub> was isolated as orange crystals (yield 24 mg, 81%).

### **1-[Gd(mpo)<sub>2</sub>( $\mu$ -O-mpo)(H<sub>2</sub>O)]<sub>2</sub>**

When GdCl<sub>3</sub>•6H<sub>2</sub>O (20 mg) or Gd(NO<sub>3</sub>)<sub>3</sub>•5(H<sub>2</sub>O) (24 mg) was used, 1-[Gd(mpo)<sub>2</sub>( $\mu$ -O-mpo)(H<sub>2</sub>O)]<sub>2</sub> was isolated as colorless crystals (yield 25 mg, 83%).

### **1-[Tb(mpo)<sub>2</sub>( $\mu$ -O-mpo)(H<sub>2</sub>O)]<sub>2</sub>**

When TbCl<sub>3</sub>•6H<sub>2</sub>O (21 mg) or Tb(NO<sub>3</sub>)<sub>3</sub>•5(H<sub>2</sub>O) (24 mg) was used, 1-[Tb(mpo)<sub>2</sub>( $\mu$ -O-mpo)(H<sub>2</sub>O)]<sub>2</sub> was isolated as colorless crystals (yield 25 mg, 83%).

General Synthesis of Ln(mpo)<sub>3</sub>(H<sub>2</sub>O)<sub>2</sub>•H<sub>2</sub>O, 2-Ln (Ln = Dy, Ho, Er, Tm, Yb, Lu): LnCl<sub>3</sub>•6H<sub>2</sub>O (0.055 mmol) or Ln(NO<sub>3</sub>)<sub>3</sub>•5H<sub>2</sub>O (0.055 mmol) in water (1.0 mL) was combined with Na(mpo) (25 mg, 0.17 mmol). Slow evaporation of the solution over a period of 24 hours resulted in X-ray-quality crystals which were washed ( $2 \times 3\text{mL}$ ) with DI water followed by ( $2 \times 3\text{mL}$ ) diethyl ether prior to data collection.

### **2-Dy(mpo)<sub>3</sub>(H<sub>2</sub>O)<sub>2</sub>•H<sub>2</sub>O**

When  $\text{DyCl}_3 \cdot 6\text{H}_2\text{O}$  (21 mg) or  $\text{Dy}(\text{NO}_3)_3 \cdot 5(\text{H}_2\text{O})$  (24 mg) was used, **2-Dy(mpo)<sub>3</sub>(H<sub>2</sub>O)<sub>2</sub>•H<sub>2</sub>O** was isolated as colorless crystals (yield 28 mg, 86%). UV/vis/NIR [ $\lambda_{\text{max}}$ , nm, single crystal]: 454 <sup>4</sup>I<sub>15/2</sub>, 760 <sup>6</sup>F<sub>3/2</sub>, 809 <sup>6</sup>F<sub>5/2</sub>, 916 <sup>6</sup>F<sub>7/2</sub>.

### **2-Ho(mpo)<sub>3</sub>(H<sub>2</sub>O)<sub>2</sub>•H<sub>2</sub>O**

When  $\text{HoCl}_3 \cdot 6\text{H}_2\text{O}$  (21 mg) or  $\text{Ho}(\text{NO}_3)_3 \cdot 5(\text{H}_2\text{O})$  (24 mg) was used, **2-Ho(mpo)<sub>3</sub>(H<sub>2</sub>O)<sub>2</sub>•H<sub>2</sub>O** was isolated as pink crystals (yield 27 mg, 82%). UV/vis/NIR [ $\lambda_{\text{max}}$ , nm, single crystal]: 415 <sup>5</sup>G<sub>5</sub>, 452, 456, 461 - all excitations are <sup>5</sup>F<sub>1</sub> or <sup>5</sup>G<sub>6</sub>, 480 <sup>5</sup>F<sub>3</sub>, 538, 542 – both excitations are <sup>6</sup>F<sub>7/2</sub> or <sup>5</sup>S<sub>2</sub>, 640 <sup>5</sup>F<sub>5</sub>.

### **2-Er(mpo)<sub>3</sub>(H<sub>2</sub>O)<sub>2</sub>•H<sub>2</sub>O**

When  $\text{ErCl}_3 \cdot 6\text{H}_2\text{O}$  (21 mg) or  $\text{Er}(\text{NO}_3)_3 \cdot 5(\text{H}_2\text{O})$  (24 mg) was used, **2-Er(mpo)<sub>3</sub>(H<sub>2</sub>O)<sub>2</sub>•H<sub>2</sub>O** was isolated as pink crystals (yield 29 mg, 88%). UV/vis/NIR [ $\lambda_{\text{max}}$ , nm, single crystal]: 489 <sup>5</sup>F<sub>7/2</sub>, 522 <sup>2</sup>H<sub>11/2</sub>, 543 <sup>4</sup>S<sub>3/2</sub>, 656 <sup>4</sup>F<sub>9/2</sub>.

### **2-Tm(mpo)<sub>3</sub>(H<sub>2</sub>O)<sub>2</sub>•H<sub>2</sub>O**

When  $\text{TmCl}_3 \cdot 6\text{H}_2\text{O}$  (21 mg) or  $\text{Tm}(\text{NO}_3)_3 \cdot 5(\text{H}_2\text{O})$  (25 mg) was used, **2-Tm(mpo)<sub>3</sub>(H<sub>2</sub>O)<sub>2</sub>•H<sub>2</sub>O** was isolated as colorless crystals (yield 27 mg, 82%). UV/vis/NIR [ $\lambda_{\text{max}}$ , nm, single crystal]: 473 <sup>1</sup>G<sub>4</sub>, 690 <sup>3</sup>F<sub>3</sub>, 795 <sup>3</sup>H<sub>4</sub>.

### **2-Yb(mpo)<sub>3</sub>(H<sub>2</sub>O)<sub>2</sub>•H<sub>2</sub>O**

When  $\text{YbCl}_3 \cdot 6\text{H}_2\text{O}$  (21 mg) or  $\text{Yb}(\text{NO}_3)_3 \cdot 5(\text{H}_2\text{O})$  (25 mg) was used, **2-Yb(mpo)<sub>3</sub>(H<sub>2</sub>O)<sub>2</sub>•H<sub>2</sub>O** was isolated as colorless crystals (yield 29 mg, 87%). UV/vis/NIR [ $\lambda_{\text{max}}$ , nm, single crystal]: 978 <sup>2</sup>F<sub>5/2</sub>.

### **2-Lu(mpo)<sub>3</sub>(H<sub>2</sub>O)<sub>2</sub>•H<sub>2</sub>O**

When  $\text{LuCl}_3 \cdot 6\text{H}_2\text{O}$  (21 mg) or  $\text{Lu}(\text{NO}_3)_3 \cdot 5(\text{H}_2\text{O})$  (25 mg) was used, **2-Lu(mpo)<sub>3</sub>(H<sub>2</sub>O)<sub>2</sub>•H<sub>2</sub>O** was isolated as colorless crystals (yield 28 mg, 84%).

## **Theory**

**Bonding.** The electronic structure and bonding of **1-Nd** and **1-Am** were studied computationally based on the experimental crystal structures, where only hydrogen atoms were optimized to keep the constraints imposed by the crystal packing. A simple yet detailed analysis was performed to the full structures by localizing the molecular electron density from a density functional theory (DFT) calculation under the Natural Bond Orbital (NBO) formalism. All calculations were performed with the ADF engine in AMS 2021.106.<sup>4</sup> The hybrid generalized gradient approximation (GGA) functional PBE0 was used along with the Slater-type basis set of triple- $\zeta$  quality STO-TZP. Scalar-relativistic effects were included in the zeroth-order regular approximation (ZORA) to the Dirac equation.<sup>5</sup> For the free ligand geometry optimization, the GGA functional PBE was considered in conjunction with the STO-TZP basis set after which a single-point calculation was performed using the hybrid GGA PBE0 functional for comparable results. NBO calculations were performed with NBO 6,<sup>6</sup> which is coupled to ADF suite.

**Ligand Field DFT.** Given the Laporte forbidden nature of *f-f* transitions, reproducing and interpreting them in terms of wavefunction composition and transition intensities from first

principles present a challenge from a theoretical viewpoint. However, recent developments on ligand field density functional theory (LFDFT)<sup>7</sup> have allowed us to reproduce accurately the lower energy portion of **1-Am** (**Figure S22**). A modified version of the LFDFT in conjunction with the version implemented in ADF have been used to obtain the intensity of the *f-f* transitions. The ligand field parameters were obtained using the hybrid GGA functional PBE0 along with the STO-TZ2P for Am and TZP for the rest of the atoms. The HF exchange for these calculations was increased to 50% for a better prediction of the energy of the excited states.

The *f-f* transitions were calculated from first principles using the static approximation, i.e. no vibrational states were considered. The electric transition dipole moments were calculated in the dipole-length form according to  $\mu = -r$ , whereas the intensities associated with a particular electronic transition between states the initial state *i* and final state *k* were obtained from

$$f_{ik} = \frac{2}{3} \Delta E_{ik} < i | \mu | k >^2$$

## Supplementary results and discussion

**Spectroscopy.** Solid-state spectra of **1-Ln** and **2-Ln** reveals a broad ligand-based transition that is generally centered about 360-390 nm and exhibit Laporte forbidden *f-f* transitions characteristic of the respective cation in an aqueous environment, see **Figures S1 – S9**. **1-Pr** shows hypersensitive transitions at 452.9 nm ( $^3H_4 \rightarrow ^3P_2$ ) and 598.1 nm ( $^3H_4 \rightarrow ^1D_2$ ), and **1-Nd** has hypersensitive transitions at 529.7 nm ( $^4I_{9/2} \rightarrow ^4G_{7/2}, ^4K_{13/2}$ ) and 590.4 nm ( $^4I_{9/2} \rightarrow ^4G_{5/2}, ^2G_{7/2}$ ), both a slight bathochromic shift compared to these transitions for the free ions.<sup>8</sup> **1-Sm** exhibits *f-f* transitions above the ligand-based transition centered about 380 nm where the most intense *f-f* transition at 407.6 nm ( $^6H_{5/2} \rightarrow ^6P_{7/2}, ^4D_{1/2}, ^4F_{9/2}$ ) is seen in the onset of the broad band. The *f-f* transitions for **1-Gd** are higher in energy than what is seen in the spectrum, and so only a broad band is observed. Monomeric pyrrithionate compounds **2-Ln** similarly show typical *f-f* transitions above approximately 390 nm. Hypersensitive transitions are observed in **2-Ho** at 453.7 nm ( $^5I_8 \rightarrow ^5G_6$ ) as well as **2-Er** at 405 nm as a shoulder of the ligand-based transition onset and at 522.7 nm ( $^4I_{15/2} \rightarrow ^2H_{11/2}$ ). Likewise, **2-Tm** exhibits *f-f* transitions at 473.2 nm ( $^3H_6 \rightarrow ^1G_4$ ), 690.6 nm ( $^3H_6 \rightarrow ^3F_3$ ), and 795.5 nm ( $^3H_6 \rightarrow ^3H_4$ ).

While the colors of **1-Ln** and **2-Ln** are largely the same as those respective ions in aqueous solution, **1-Eu** and **2-Yb** appear orange and yellow in color, respectively. Solid-state absorption spectra of **1-Eu** (**Figure S4**) shows a charge transfer band centered about 424 nm and spectra of **2-Yb** (**Figure S9**) shows this charge transfer band centered at 401 nm, which are both marginally lower in energy than the LMCT band observed for isomorphous **1-Ln** and **2-Ln**. Spectra of **1-Eu** shows the absorption of more light in the region from 425-450 nm compared to **2-Yb**, resulting in the transmission of more orange light in **1-Eu** compared to **2-Yb**. While atypical for most Eu(III) and Yb(III) aqueous complexes this phenomenon has been reported elsewhere with ligands that feature soft donor atoms, namely dithiocarbamates.<sup>9</sup>

Only **1-Tb** exhibited phosphorescence of the lanthanide pyrrhionate complexes, **Figure S10**, where excitation using 420 nm at 298 K showed transitions characteristic of Tb(III) at 490.2 nm ( $^5D_4 \rightarrow ^7F_6$ ), 544.3 nm ( $^5D_4 \rightarrow ^7F_5$ ), 586.6 nm ( $^5D_4 \rightarrow ^7F_4$ ), and 618.0 nm ( $^5D_4 \rightarrow ^7F_3$ ).

**Bonding.** Bond orders have been estimated with the Wiberg and NLMO approximations. The former is considered a standard approximation to estimate bond orders, whereas the latter distinguishes between bonding and antibonding interactions providing additional information of the bond. Furthermore, NLMO-based bond indices (NLMO-BI) can be decomposed in individual NLMO contributions that can be useful to identify the NLMOs that describe more appropriately the bond. **Table S30** summarizes the M–L (M = Nd, Eu, Am; L = S, O) bond orders predicted by both formalisms showing the expected trend, i.e. Am–L bonds are stronger than Ln–L bonds. Bridging O<sub>mpo</sub> atoms show significantly weaker bonds ( $\Delta\text{WBI} > 0.1$ ) with respect to the other two non-bridging mpo ligands, which unexpectedly weakens the M–S coordination ( $\Delta\text{WBI} > 0.1$ ). This could relate to synergistic effects between the sulfur and oxygen atoms in mpo. This same trend is observed throughout the NLMO-BIs, though showing smaller values owing to the antibonding contributions to the bond order. Overall, the order of strength follows M–mpo3(6) > M–mpo2(5) > M–mpo1(4) (labels correspond to those of **Figure 3**).

Following the order of bond strength, M–O bonds also show differences among them, though mpo2 and mpo3 are not distinguishable as show for M–S bonds. Therefore, M–mpo2 and M–mpo3 bonds show similar bonding components including a  $\sigma$ - and a  $\pi$ -contribution with similar metal contributions (**Figure S19**). Interestingly, for the Am–O3 NLMOs, the 5f hybrid composition is significantly lower than even the Nd–O3 NLMOs, which is compensated by an increase of the 6d orbital contribution. Conversely, the double interaction of the bridging M–O bonds causes their NLMOs to differ from the other bonds, denoting the weaker interaction lacking of a significant  $\pi$  component. Similarly, the M–O<sub>water</sub> bond compares to that of the bridges in terms of bond orders, which is also explained by the lack of a  $\pi$ -contribution that could reinforce the bond. Overall, the Eu – L bonds are slightly weaker than those of **1-Nd** with less involvement of the 4f shell. This might be attributed to the fact that the 4f shell is more shielded in Eu than Nd due to the progressive orbital contraction. Thus, comparing isovalent configurations such as Am and Eu highlights the difference in bonding in the same footing in terms of valence electrons.

Given the delocalized nature of the ligand (**Figure S19**), a final approach to study the metal–ligand interaction can be performed by scrutinizing the structural and electronic arrangements of the ligand upon complexation. The geometry of the mpo was optimized as a free ligand and compared to the average structures in the corresponding complexes. From the structural comparison, it is clear that the C–S and N–O distances elongate upon coordination, while the C–N bond contracts (**Table S31**). This suggests a weakening of the C–S and N–O because of the metal interaction that is compensated with a strengthening of the C–N bond, which is confirmed by calculated bond orders (**Table S32**). Our calculated values suggest an increase in the C–N WBIs by > 0.1 and a decreased in the C–S and N–O WBIs by ~ 0.1 and ~ 0.2, respectively. Furthermore, the stabilization coming from the delocalization of on sulfur lone pair (LP) to an antibonding N–O NBO in the form of a hyperbond (3-center 4-electron interaction) observed in the free ligand is completely altered upon coordination where a different sulfur LP is significantly delocalized toward the C–N bond. This supports and provides an explanation to the observed structural and electronic changes in the ligand because of the metal ligation.

While the hydroxamic acid motif has been heavily studied for decades across the *f*-block, this body of work aims to show the potential behind the five-membered ring encountered in hydroxamate coordination complexes and that it can be tuned using differing donor atoms to selectively bind a variety of metal ions. Thioamides specifically have been largely neglected in the chelation of *f*-elements and herein we show that pyrithione displays considerable electronic variation upon coordination with respect to specific cations in the *f*-block.

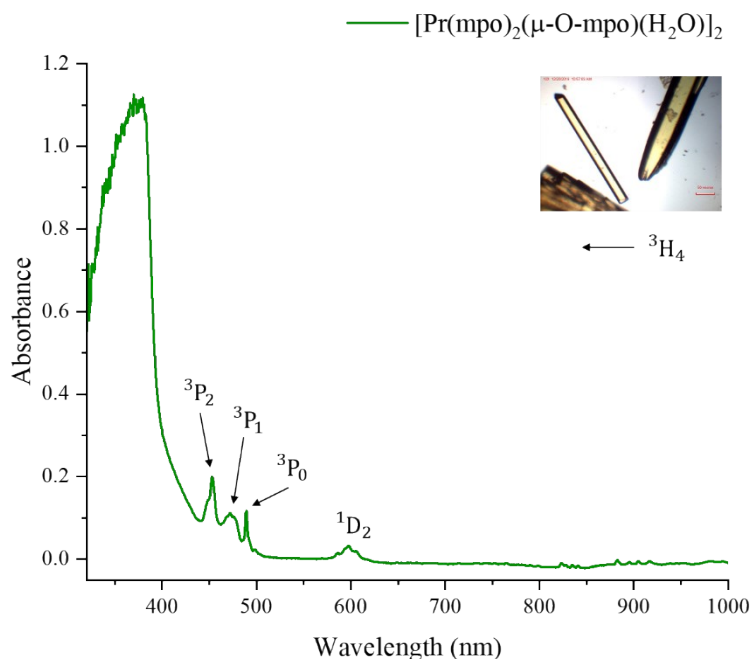

**Figure S1, 1-Pr:** Solid state UV-vis/NIR absorption spectra of  $[\text{Pr}(\text{mpo})_2(\mu\text{-O-mpo})(\text{H}_2\text{O})]_2$ .

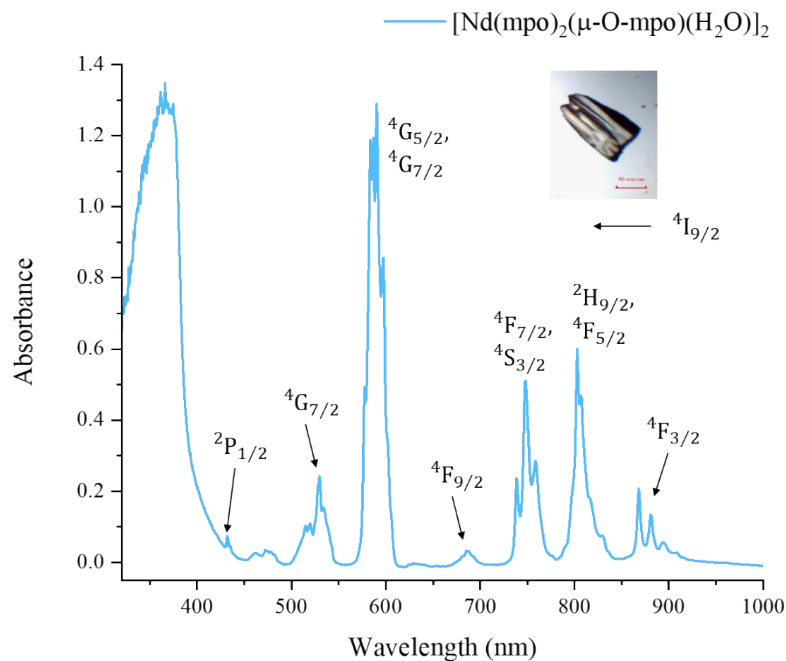

**Figure S2, 1-Nd:** Solid state UV-vis/NIR absorption spectrum of  $[\text{Nd}(\text{mpo})_2(\mu\text{-O-mpo})(\text{H}_2\text{O})_2]$ .

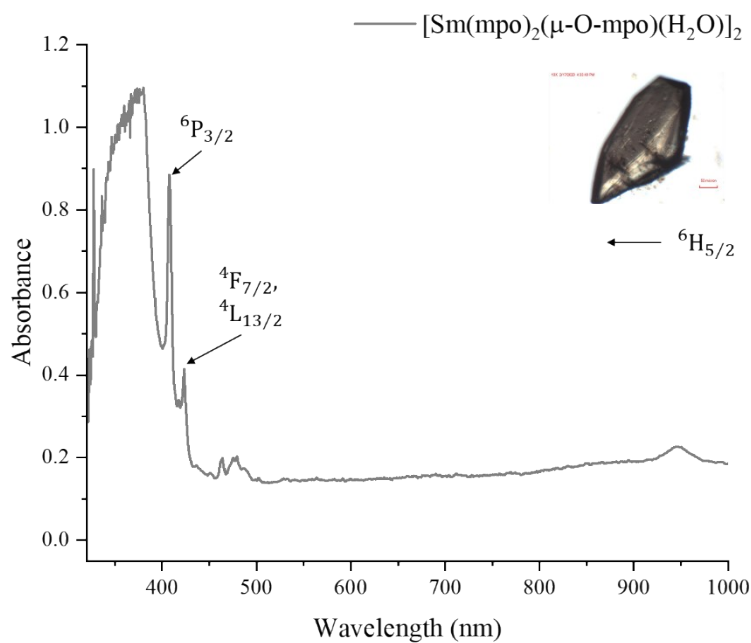

**Figure S3, 1-Sm:** Solid state UV-vis/NIR absorption spectrum of  $[\text{Sm}(\text{mpo})_2(\mu\text{-O-mpo})(\text{H}_2\text{O})_2]$ .



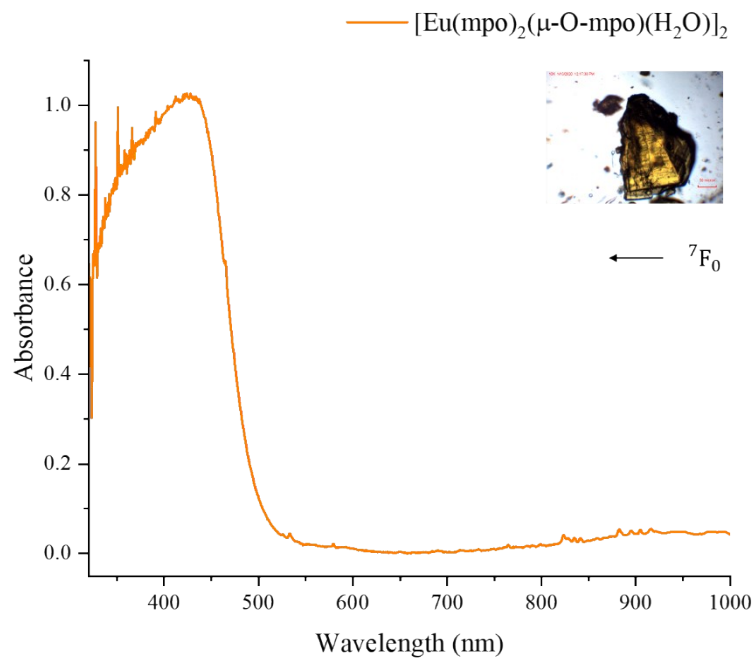

**Figure S4, 1-Eu:** Uv-vis/NIR absorption spectrum of  $[\text{Eu}(\text{mpo})_2(\mu\text{-O-mpo})(\text{H}_2\text{O})]_2$ .

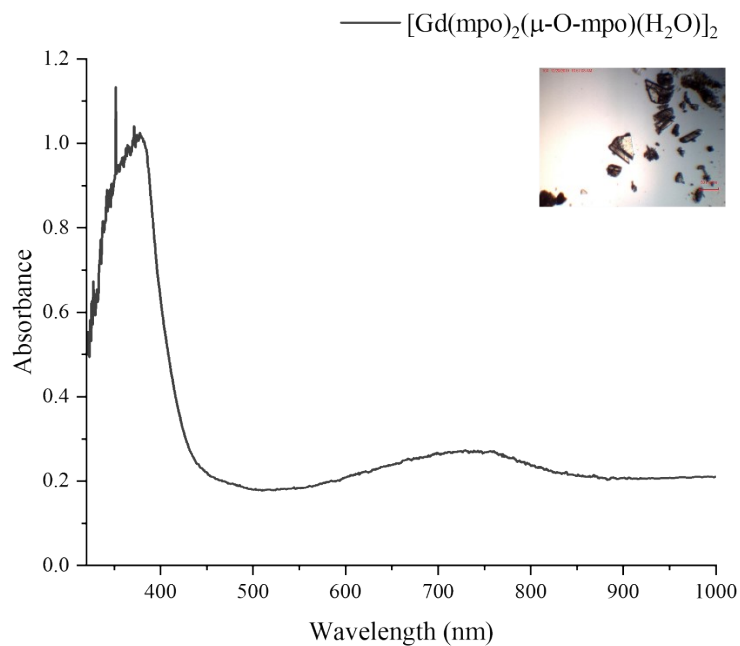

**Figure S5, 1-Gd:** Uv-vis/NIR absorption spectrum of  $[\text{Gd}(\text{mpo})_2(\mu\text{-O-mpo})(\text{H}_2\text{O})]_2$ .

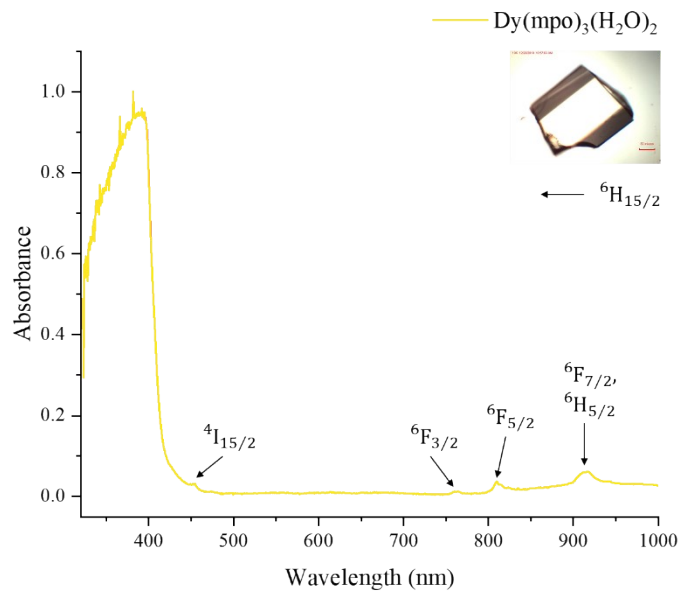

**Figure S6, 2-Dy:** UV-vis/NIR absorption spectrum of  $\text{Dy(mpo)}_3(\text{H}_2\text{O})_2 \cdot \text{H}_2\text{O}$ .

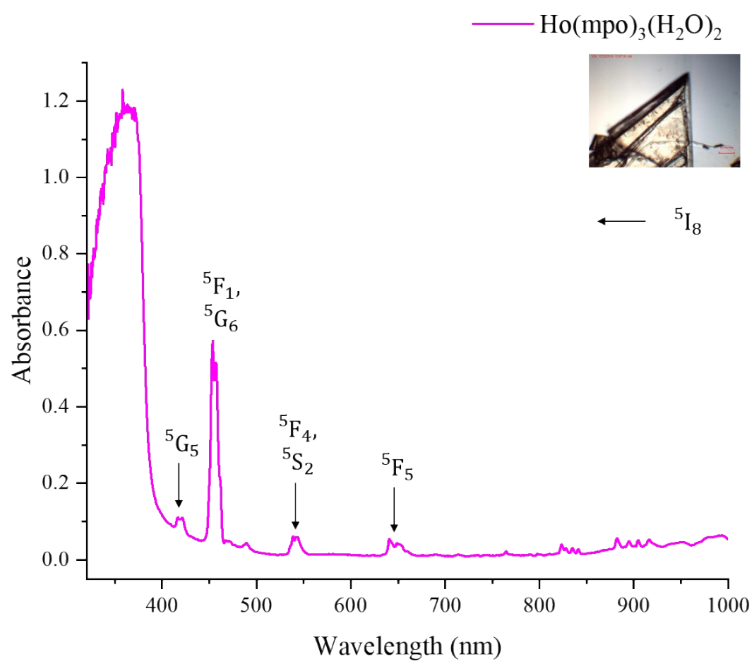

**Figure S7, 2-Ho:** UV-vis/NIR absorption spectra of  $\text{Ho(mpo)}_3(\text{H}_2\text{O})_2 \cdot \text{H}_2\text{O}$ .

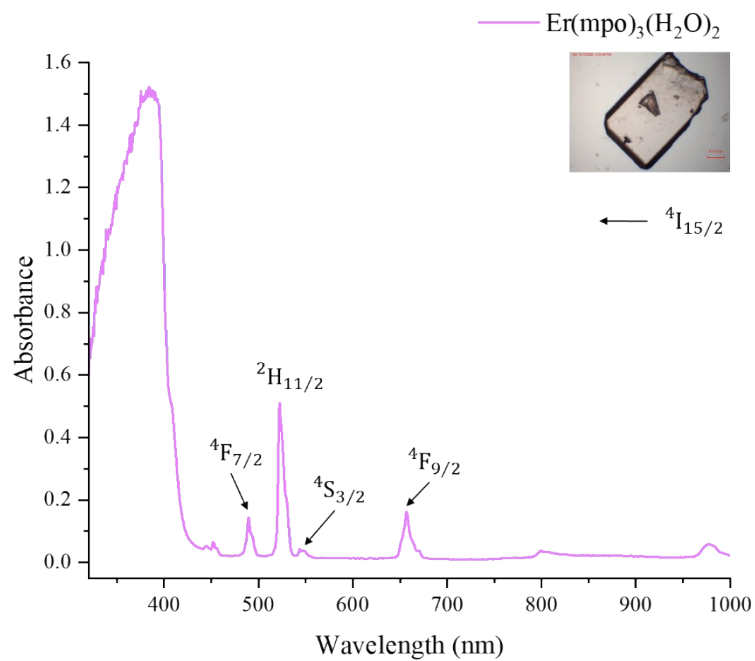

**Figure S8, 2-Er:** UV-vis/NIR absorption spectra of Er(mpo)<sub>3</sub>(H<sub>2</sub>O)<sub>2</sub>•H<sub>2</sub>O.

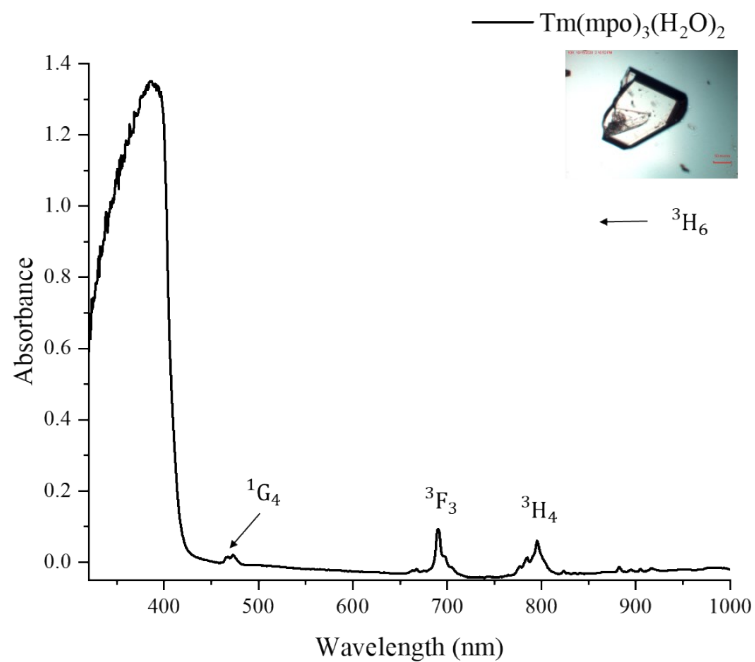

**Figure S9, 2-Tm:** UV-vis/NIR absorption spectra of Tm(mpo)<sub>3</sub>(H<sub>2</sub>O)<sub>2</sub>•H<sub>2</sub>O.

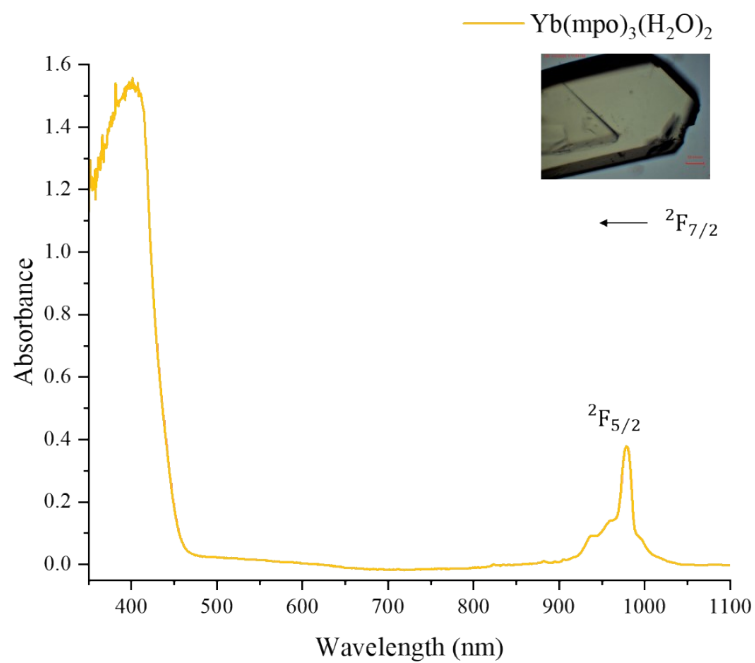

**Figure S10, 2-Yb:** UV-vis/NIR absorption spectra of Yb(mpo)<sub>3</sub>(H<sub>2</sub>O)<sub>2</sub>•H<sub>2</sub>O.

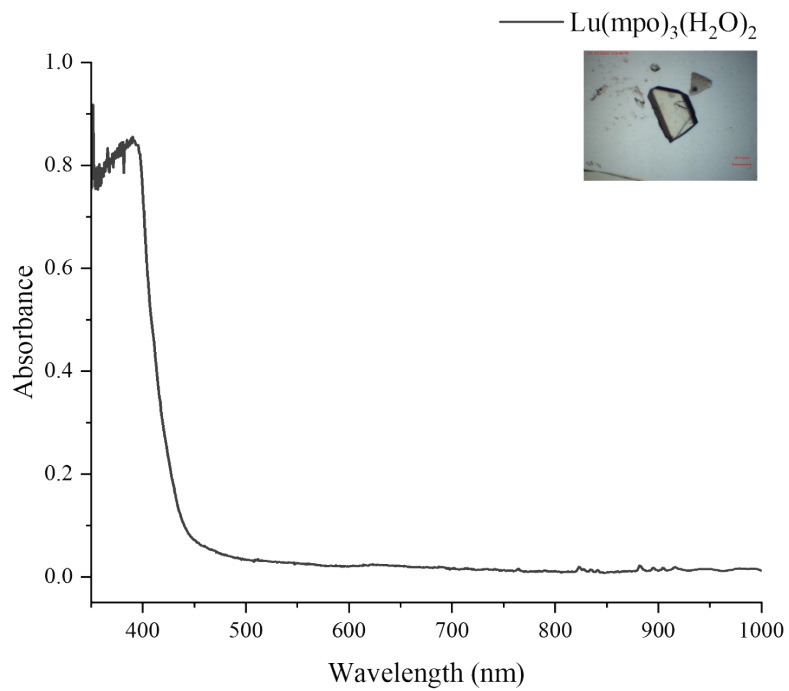

**Figure S11, 2-Lu:** UV-vis/NIR absorption spectra of Lu(mpo)<sub>3</sub>(H<sub>2</sub>O)<sub>2</sub>•H<sub>2</sub>O.

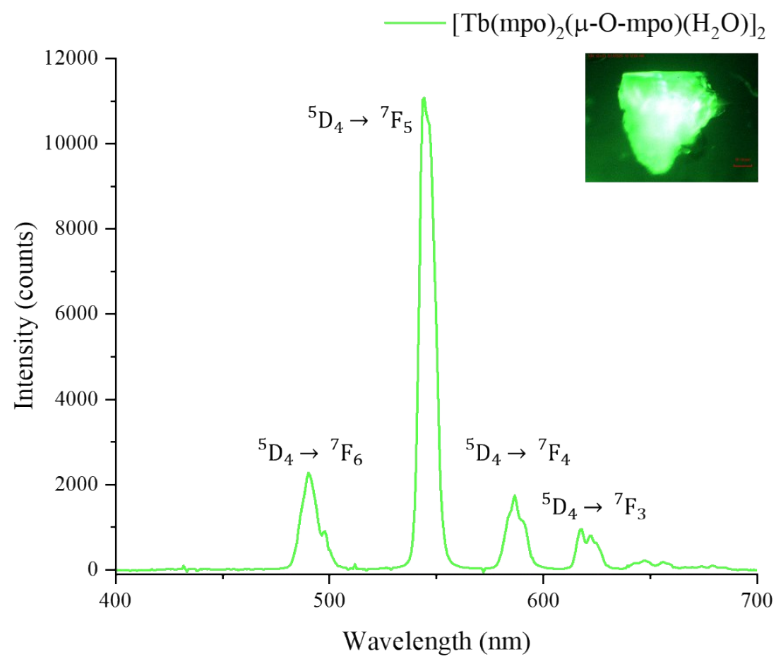

**Figure S12, 1-Tb:** Phosphorescence of  $[\text{Tb}(\text{mpo})_2(\mu\text{-O-mpo})(\text{H}_2\text{O})]_2$  at 298 K with 420 nm excitation.

**Table S1.** Selected bond lengths for the **1-Am** complex. Labels correspond to those shown in **Figure 3**.

|    | S1       | S2       | S3       | O1       | O2       | O3       |
|----|----------|----------|----------|----------|----------|----------|
| Am | 2.946(2) | 2.889(2) | 2.873(2) | 2.470(4) | 2.368(4) | 2.357(4) |

**Table S2.** Selected averaged bond distances for  $[M(\text{mpo})_2(\mu\text{-O-mpo})(\text{H}_2\text{O})]_2$ .

| <b>1-M</b>               | <b>Pr</b> | <b>Nd</b> | <b>Sm</b> | <b>Eu</b> | <b>Gd</b> | <b>Tb</b> | <b>Am</b> |
|--------------------------|-----------|-----------|-----------|-----------|-----------|-----------|-----------|
| 6-coordinate ionic radii | 0.99      | 0.983     | 0.958     | 0.947     | 0.938     | 0.923     | 0.975     |
| Ln-O <sub>mpo</sub> (Å)  | 2.403(2)  | 2.393 (2) | 2.363(2)  | 2.354 (2) | 2.348 (1) | 2.338 (1) | 2.398 (2) |
| Ln-S (Å)                 | 2.952(1)  | 2.934 (1) | 2.908(1)  | 2.899 (1) | 2.886 (2) | 2.886 (2) | 2.903 (1) |
| <i>M – M dist</i>        | 4.293 (3) | 4.272 (2) | 4.222 (5) | 4.207 (5) | 4.187 (3) | 4.179 (8) | 4.255 (4) |

**Table S3:** Selected averaged bond distances for **2-Ln**.

| <b>1-Ln</b>              | <b>Dy</b> | <b>Ho</b> | <b>Er</b> | <b>Tm</b> | <b>Yb</b> | <b>Lu</b> |
|--------------------------|-----------|-----------|-----------|-----------|-----------|-----------|
| 6-coordinate ionic radii | 0.912     | 0.901     | 0.890     | 0.880     | 0.868     | 0.861     |
| Ln-S (Å)                 | 2.829(1)  | 2.818(1)  | 2.801(1)  | 2.796(1)  | 2.784(1)  | 2.775(1)  |
| Ln-O <sub>mpo</sub> (Å)  | 2.343(2)  | 2.333(2)  | 2.322(2)  | 2.314(2)  | 2.301(2)  | 2.295(2)  |

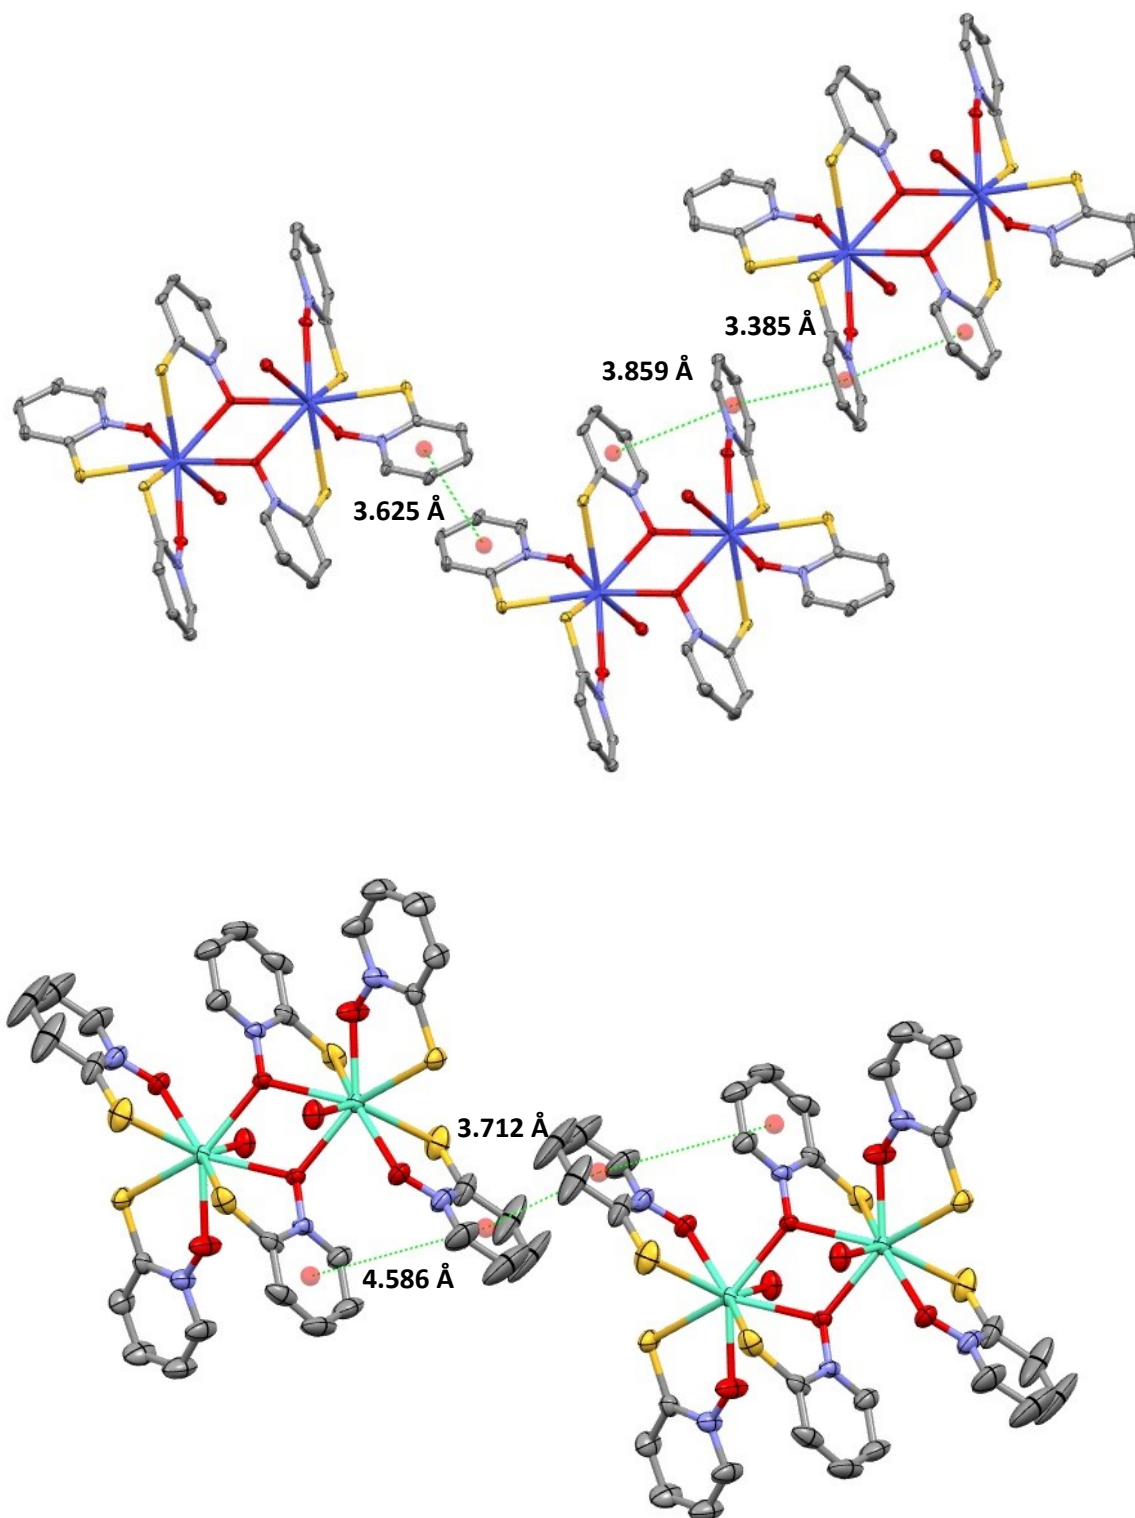

**Figure S13:** Crystal packing of **1-Am** (top) and **1-Nd** (bottom) where solvent molecules and hydrogens are omitted for clarity.

## Crystallographic Data

| <b>Table S4 Crystal data and structure refinement for [Pr(mpo)<sub>2</sub>(<math>\mu</math>-O-mpo)(H<sub>2</sub>O)]<sub>2</sub></b> |                                                                                |
|-------------------------------------------------------------------------------------------------------------------------------------|--------------------------------------------------------------------------------|
| Empirical formula                                                                                                                   | C <sub>15</sub> H <sub>14</sub> N <sub>3</sub> O <sub>4</sub> PrS <sub>3</sub> |
| Formula weight                                                                                                                      | 537.38                                                                         |
| Temperature/K                                                                                                                       | 296.15                                                                         |
| Crystal system                                                                                                                      | monoclinic                                                                     |
| Space group                                                                                                                         | <i>P2<sub>1</sub>/c</i>                                                        |
| <i>a</i> /Å                                                                                                                         | 10.1531(2)                                                                     |
| <i>b</i> /Å                                                                                                                         | 10.0034(2)                                                                     |
| <i>c</i> /Å                                                                                                                         | 19.5478(5)                                                                     |
| $\alpha$ /°                                                                                                                         | 90                                                                             |
| $\beta$ /°                                                                                                                          | 95.0440(10)                                                                    |
| $\gamma$ /°                                                                                                                         | 90                                                                             |
| Volume/Å <sup>3</sup>                                                                                                               | 1977.69(8)                                                                     |
| <i>Z</i>                                                                                                                            | 4                                                                              |
| $\rho$ calc/g/cm <sup>3</sup>                                                                                                       | 1.805                                                                          |
| $\mu$ /mm <sup>-1</sup>                                                                                                             | 2.804                                                                          |
| <i>F</i> (000)                                                                                                                      | 1056.0                                                                         |
| Crystal size/mm <sup>3</sup>                                                                                                        | 0.419 × 0.22 × 0.193                                                           |
| Radiation                                                                                                                           | MoK $\alpha$ ( $\lambda$ = 0.71073)                                            |
| 2 $\theta$ range for data collection/°                                                                                              | 4.028 to 74.48                                                                 |
| Index ranges                                                                                                                        | -17 ≤ <i>h</i> ≤ 17, -17 ≤ <i>k</i> ≤ 17, -33 ≤ <i>l</i> ≤ 33                  |
| Reflections collected                                                                                                               | 107132                                                                         |
| Independent reflections                                                                                                             | 10213 [R <sub>int</sub> = 0.0640, R <sub>sigma</sub> = 0.0349]                 |
| Data/restraints/parameters                                                                                                          | 10213/0/236                                                                    |
| Goodness-of-fit on <i>F</i> <sup>2</sup>                                                                                            | 1.029                                                                          |
| Final <i>R</i> indexes [ <i>I</i> ≥ 2 $\sigma$ ( <i>I</i> )]                                                                        | R <sub>1</sub> = 0.0351, wR <sub>2</sub> = 0.0654                              |
| Final <i>R</i> indexes [all data]                                                                                                   | R <sub>1</sub> = 0.0573, wR <sub>2</sub> = 0.0728                              |
| Largest diff. peak/hole / e Å <sup>-3</sup>                                                                                         | 0.81/-1.24                                                                     |



| Table S5 Bond Lengths for [Pr(mpo) <sub>2</sub> ( $\mu$ -O-mpo)(H <sub>2</sub> O)] <sub>2</sub> |      |             |      |      |            |
|-------------------------------------------------------------------------------------------------|------|-------------|------|------|------------|
| Atom                                                                                            | Atom | Length/Å    | Atom | Atom | Length/Å   |
| Pr1                                                                                             | S1   | 2.9604 (6)  | N1   | C1   | 1.357 (3)  |
| Pr1                                                                                             | S3   | 2.9979 (6)  | N1   | C5   | 1.351 (3)  |
| Pr1                                                                                             | S2   | 2.8993 (8)  | N2   | C6   | 1.355 (5)  |
| Pr1                                                                                             | O31  | 2.5143 (15) | N2   | C10  | 1.360 (5)  |
| Pr1                                                                                             | O3   | 2.5183 (14) | C15  | C14  | 1.372 (4)  |
| Pr1                                                                                             | O4   | 2.4669 (18) | C1   | C2   | 1.393 (3)  |
| Pr1                                                                                             | O2   | 2.3407 (16) | C11  | C12  | 1.409 (3)  |
| Pr1                                                                                             | O1   | 2.3538 (18) | C5   | C4   | 1.352 (4)  |
| S1                                                                                              | C1   | 1.708 (2)   | C14  | C13  | 1.378 (6)  |
| S3                                                                                              | C11  | 1.719 (3)   | C2   | C3   | 1.368 (4)  |
| S2                                                                                              | C6   | 1.710 (4)   | C12  | C13  | 1.365 (5)  |
| O3                                                                                              | N3   | 1.358 (2)   | C4   | C3   | 1.381 (4)  |
| O2                                                                                              | N2   | 1.324 (3)   | C6   | C7   | 1.407 (5)  |
| N3                                                                                              | C15  | 1.346 (3)   | C10  | C9   | 1.367 (7)  |
| N3                                                                                              | C11  | 1.360 (3)   | C7   | C8   | 1.354 (9)  |
| O1                                                                                              | N1   | 1.329 (3)   | C9   | C8   | 1.347 (11) |

<sup>1</sup>1-X,1-Y,1-Z

**Table S6 Crystal data and structure refinement for [Nd(mpo)<sub>2</sub>( $\mu$ -O-mpo)(H<sub>2</sub>O)]<sub>2</sub>**

|                                                              |                                                                                |
|--------------------------------------------------------------|--------------------------------------------------------------------------------|
| Empirical formula                                            | C <sub>15</sub> H <sub>14</sub> N <sub>3</sub> NdO <sub>4</sub> S <sub>3</sub> |
| Formula weight                                               | 540.71                                                                         |
| Temperature/K                                                | 296.15                                                                         |
| Crystal system                                               | monoclinic                                                                     |
| Space group                                                  | <i>P</i> 2 <sub>1</sub> / <i>c</i>                                             |
| <i>a</i> /Å                                                  | 10.1252(2)                                                                     |
| <i>b</i> /Å                                                  | 9.9839(2)                                                                      |
| <i>c</i> /Å                                                  | 19.5248(5)                                                                     |
| $\alpha$ /°                                                  | 90                                                                             |
| $\beta$ /°                                                   | 95.0050(10)                                                                    |
| $\gamma$ /°                                                  | 90                                                                             |
| Volume/Å <sup>3</sup>                                        | 1966.22(7)                                                                     |
| <i>Z</i>                                                     | 4                                                                              |
| $\rho$ calc/g/cm <sup>3</sup>                                | 1.827                                                                          |
| $\mu$ /mm <sup>-1</sup>                                      | 2.984                                                                          |
| <i>F</i> (000)                                               | 1060.0                                                                         |
| Crystal size/mm <sup>3</sup>                                 | 0.277 × 0.243 × 0.158                                                          |
| Radiation                                                    | MoK $\alpha$ ( $\lambda$ = 0.71073)                                            |
| 2 $\theta$ range for data collection/°                       | 4.038 to 82.254                                                                |
| Index ranges                                                 | -18 ≤ <i>h</i> ≤ 18, -18 ≤ <i>k</i> ≤ 18, -36 ≤ <i>l</i> ≤ 36                  |
| Reflections collected                                        | 112293                                                                         |
| Independent reflections                                      | 13041 [R <sub>int</sub> = 0.0411, R <sub>sigma</sub> = 0.0233]                 |
| Data/restraints/parameters                                   | 13041/0/236                                                                    |
| Goodness-of-fit on <i>F</i> <sup>2</sup>                     | 1.176                                                                          |
| Final <i>R</i> indexes [ <i>I</i> ≥ 2 $\sigma$ ( <i>I</i> )] | <i>R</i> 1 = 0.0383, <i>wR</i> 2 = 0.0805                                      |
| Final <i>R</i> indexes [all data]                            | <i>R</i> 1 = 0.0467, <i>wR</i> 2 = 0.0847                                      |
| Largest diff. peak/hole / e Å <sup>-3</sup>                  | 1.45/-2.04                                                                     |

| Table S7 Bond Lengths for [Nd(mpo) <sub>2</sub> ( $\mu$ -O-mpo)(H <sub>2</sub> O)] <sub>2</sub> |      |             |      |      |            |
|-------------------------------------------------------------------------------------------------|------|-------------|------|------|------------|
| Atom                                                                                            | Atom | Length/Å    | Atom | Atom | Length/Å   |
| Nd1                                                                                             | S1   | 2.9450 (5)  | N1   | C1   | 1.358 (3)  |
| Nd1                                                                                             | S3   | 2.9800 (6)  | N1   | C5   | 1.353 (3)  |
| Nd1                                                                                             | S2   | 2.8790 (8)  | N2   | C6   | 1.359 (5)  |
| Nd1                                                                                             | O31  | 2.5013 (13) | N2   | C10  | 1.358 (5)  |
| Nd1                                                                                             | O3   | 2.5026 (13) | C15  | C14  | 1.380 (4)  |
| Nd1                                                                                             | O4   | 2.4472 (18) | C1   | C2   | 1.400 (3)  |
| Nd1                                                                                             | O2   | 2.3335 (16) | C11  | C12  | 1.409 (3)  |
| Nd1                                                                                             | O1   | 2.3441 (18) | C14  | C13  | 1.372 (6)  |
| S1                                                                                              | C1   | 1.708 (2)   | C12  | C13  | 1.364 (5)  |
| S3                                                                                              | C11  | 1.718 (3)   | C2   | C3   | 1.370 (4)  |
| S2                                                                                              | C6   | 1.707 (4)   | C5   | C4   | 1.355 (4)  |
| O3                                                                                              | N3   | 1.3540 (19) | C3   | C4   | 1.379 (4)  |
| O2                                                                                              | N2   | 1.323 (3)   | C6   | C7   | 1.405 (4)  |
| N3                                                                                              | C15  | 1.350 (3)   | C10  | C9   | 1.365 (7)  |
| N3                                                                                              | C11  | 1.365 (3)   | C9   | C8   | 1.336 (12) |
| O1                                                                                              | N1   | 1.322 (2)   | C7   | C8   | 1.365 (10) |

<sup>1</sup>1-X,1-Y,1-Z

| <b>Table S8 Crystal data and structure refinement for [Sm(mpo)<sub>2</sub>(μ-O-mpo)(H<sub>2</sub>O)]<sub>2</sub></b> |                                                                                 |
|----------------------------------------------------------------------------------------------------------------------|---------------------------------------------------------------------------------|
| Empirical formula                                                                                                    | C <sub>15</sub> H <sub>14</sub> N <sub>3</sub> O <sub>4</sub> S <sub>3</sub> Sm |
| Formula weight                                                                                                       | 546.82                                                                          |
| Temperature/K                                                                                                        | 273.15                                                                          |
| Crystal system                                                                                                       | monoclinic                                                                      |
| Space group                                                                                                          | <i>P</i> 2 <sub>1</sub> / <i>c</i>                                              |
| <i>a</i> /Å                                                                                                          | 10.0701(15)                                                                     |
| <i>b</i> /Å                                                                                                          | 9.9650(14)                                                                      |
| <i>c</i> /Å                                                                                                          | 19.421(3)                                                                       |
| $\alpha$ /°                                                                                                          | 90                                                                              |
| $\beta$ /°                                                                                                           | 94.919(4)                                                                       |
| $\gamma$ /°                                                                                                          | 90                                                                              |
| Volume/Å <sup>3</sup>                                                                                                | 1941.7(5)                                                                       |
| <i>Z</i>                                                                                                             | 4                                                                               |
| $\rho$ calc/gcm <sup>3</sup>                                                                                         | 1.871                                                                           |
| $\mu$ /mm <sup>-1</sup>                                                                                              | 3.372                                                                           |
| <i>F</i> (000)                                                                                                       | 1068.0                                                                          |
| Crystal size/mm <sup>3</sup>                                                                                         | 0.487 × 0.163 × 0.148                                                           |
| Radiation                                                                                                            | MoK $\alpha$ ( $\lambda$ = 0.71073)                                             |
| 2 $\theta$ range for data collection/°                                                                               | 4.598 to 58.008                                                                 |
| Index ranges                                                                                                         | -13 ≤ <i>h</i> ≤ 13, -13 ≤ <i>k</i> ≤ 13, -26 ≤ <i>l</i> ≤ 26                   |
| Reflections collected                                                                                                | 88915                                                                           |
| Independent reflections                                                                                              | 5167 [R <sub>int</sub> = 0.0582, R <sub>sigma</sub> = 0.0216]                   |
| Data/restraints/parameters                                                                                           | 5167/0/236                                                                      |
| Goodness-of-fit on <i>F</i> <sup>2</sup>                                                                             | 1.106                                                                           |
| Final <i>R</i> indexes [ <i>I</i> ≥ 2 $\sigma$ ( <i>I</i> )]                                                         | <i>R</i> 1 = 0.0296, <i>wR</i> 2 = 0.0666                                       |
| Final <i>R</i> indexes [all data]                                                                                    | <i>R</i> 1 = 0.0389, <i>wR</i> 2 = 0.0719                                       |
| Largest diff. peak/hole / e Å <sup>-3</sup>                                                                          | 0.96/-0.52                                                                      |

| Table S9 Bond Lengths for [Sm(mpo) <sub>2</sub> ( $\mu$ -O-mpo)(H <sub>2</sub> O)] <sub>2</sub> |      |             |      |      |            |
|-------------------------------------------------------------------------------------------------|------|-------------|------|------|------------|
| Atom                                                                                            | Atom | Length/Å    | Atom | Atom | Length/Å   |
| Sm1                                                                                             | S1   | 2.9209 (9)  | N1   | C1   | 1.355 (4)  |
| Sm1                                                                                             | S3   | 2.9527 (10) | N1   | C5   | 1.355 (5)  |
| Sm1                                                                                             | S2   | 2.8502 (12) | N2   | C6   | 1.353 (7)  |
| Sm1                                                                                             | O31  | 2.470 (2)   | N2   | C10  | 1.351 (6)  |
| Sm1                                                                                             | O3   | 2.472 (2)   | C15  | C14  | 1.371 (6)  |
| Sm1                                                                                             | O4   | 2.415 (2)   | C14  | C13  | 1.369 (8)  |
| Sm1                                                                                             | O2   | 2.306 (2)   | C11  | C12  | 1.410 (5)  |
| Sm1                                                                                             | O1   | 2.313 (3)   | C1   | C2   | 1.409 (5)  |
| S1                                                                                              | C1   | 1.705 (4)   | C12  | C13  | 1.368 (7)  |
| S3                                                                                              | C11  | 1.717 (4)   | C6   | C7   | 1.407 (6)  |
| S2                                                                                              | C6   | 1.706 (6)   | C2   | C3   | 1.361 (6)  |
| O3                                                                                              | N3   | 1.359 (3)   | C5   | C4   | 1.352 (6)  |
| O2                                                                                              | N2   | 1.324 (4)   | C10  | C9   | 1.347 (8)  |
| N3                                                                                              | C15  | 1.346 (5)   | C3   | C4   | 1.377 (6)  |
| N3                                                                                              | C11  | 1.355 (5)   | C7   | C8   | 1.373 (11) |
| N1                                                                                              | O1   | 1.322 (4)   | C9   | C8   | 1.338 (13) |

<sup>1</sup>1-X,1-Y,1-Z

| <b>Table S10 Crystal data and structure refinement for [Eu(mpo)<sub>2</sub>(μ-O-mpo)(H<sub>2</sub>O)]<sub>2</sub></b> |                                                                                |
|-----------------------------------------------------------------------------------------------------------------------|--------------------------------------------------------------------------------|
| Empirical formula                                                                                                     | C <sub>15</sub> H <sub>14</sub> EuN <sub>3</sub> O <sub>4</sub> S <sub>3</sub> |
| Formula weight                                                                                                        | 548.43                                                                         |
| Temperature/K                                                                                                         | 273.15                                                                         |
| Crystal system                                                                                                        | monoclinic                                                                     |
| Space group                                                                                                           | <i>P</i> 2 <sub>1</sub> / <i>c</i>                                             |
| <i>a</i> /Å                                                                                                           | 10.0543(13)                                                                    |
| <i>b</i> /Å                                                                                                           | 9.9635(13)                                                                     |
| <i>c</i> /Å                                                                                                           | 19.422(3)                                                                      |
| $\alpha$ /°                                                                                                           | 90                                                                             |
| $\beta$ /°                                                                                                            | 94.902(4)                                                                      |
| $\gamma$ /°                                                                                                           | 90                                                                             |
| Volume/Å <sup>3</sup>                                                                                                 | 1938.5(4)                                                                      |
| <i>Z</i>                                                                                                              | 4                                                                              |
| $\rho$ calc/gcm <sup>3</sup>                                                                                          | 1.879                                                                          |
| $\mu$ /mm <sup>-1</sup>                                                                                               | 3.583                                                                          |
| <i>F</i> (000)                                                                                                        | 1072.0                                                                         |
| Crystal size/mm <sup>3</sup>                                                                                          | 0.359 × 0.158 × 0.148                                                          |
| Radiation                                                                                                             | MoK $\alpha$ ( $\lambda$ = 0.71073)                                            |
| 2 $\theta$ range for data collection/°                                                                                | 4.598 to 56.664                                                                |
| Index ranges                                                                                                          | -13 ≤ <i>h</i> ≤ 13, -13 ≤ <i>k</i> ≤ 13, -25 ≤ <i>l</i> ≤ 25                  |
| Reflections collected                                                                                                 | 83814                                                                          |
| Independent reflections                                                                                               | 4822 [ <i>R</i> <sub>int</sub> = 0.0500, <i>R</i> <sub>sigma</sub> = 0.0185]   |
| Data/restraints/parameters                                                                                            | 4822/0/236                                                                     |
| Goodness-of-fit on <i>F</i> <sup>2</sup>                                                                              | 1.127                                                                          |
| Final <i>R</i> indexes [ <i>I</i> ≥ 2 $\sigma$ ( <i>I</i> )]                                                          | <i>R</i> <sub>1</sub> = 0.0253, <i>wR</i> <sub>2</sub> = 0.0477                |
| Final <i>R</i> indexes [all data]                                                                                     | <i>R</i> <sub>1</sub> = 0.0335, <i>wR</i> <sub>2</sub> = 0.0511                |
| Largest diff. peak/hole / e Å <sup>-3</sup>                                                                           | 0.82/-0.62                                                                     |

**Table S11 Bond Lengths for [Eu(mpo)<sub>2</sub>( $\mu$ -O-mpo)(H<sub>2</sub>O)]<sub>2</sub>**

| <b>Atom</b> | <b>Atom</b> | <b>Length/Å</b> | <b>Atom</b> | <b>Atom</b> | <b>Length/Å</b> |
|-------------|-------------|-----------------|-------------|-------------|-----------------|
| Eu01        | Eu011       | 4.2072 (5)      | N1          | C1          | 1.356 (4)       |
| Eu01        | S1          | 2.9118 (8)      | N1          | C5          | 1.354 (4)       |
| Eu01        | S3          | 2.9438 (9)      | N2          | C6          | 1.357 (5)       |
| Eu01        | S2          | 2.8407 (11)     | N2          | C10         | 1.355 (5)       |
| Eu01        | O31         | 2.4631 (19)     | C15         | C14         | 1.374 (5)       |
| Eu01        | O3          | 2.4623 (19)     | C14         | C13         | 1.373 (7)       |
| Eu01        | O2          | 2.296 (2)       | C1          | C2          | 1.405 (4)       |
| Eu01        | O4          | 2.405 (2)       | C5          | C4          | 1.351 (5)       |
| Eu01        | O1          | 2.306 (2)       | C11         | C12         | 1.405 (4)       |
| S1          | C1          | 1.704 (3)       | C12         | C13         | 1.368 (6)       |
| S3          | C11         | 1.722 (4)       | C2          | C3          | 1.370 (5)       |
| S2          | C6          | 1.714 (5)       | C6          | C7          | 1.399 (6)       |
| O3          | N3          | 1.359 (3)       | C10         | C9          | 1.355 (7)       |
| O2          | N2          | 1.328 (4)       | C4          | C3          | 1.382 (5)       |
| N3          | C15         | 1.344 (4)       | C9          | C8          | 1.354 (10)      |
| N3          | C11         | 1.361 (4)       | C7          | C8          | 1.366 (9)       |
| O1          | N1          | 1.322 (3)       |             |             |                 |

<sup>1</sup>1-X,1-Y,1-Z

**Table S12 Crystal data and structure refinement for [Gd(mpo)<sub>2</sub>( $\mu$ -O-mpo)(H<sub>2</sub>O)]<sub>2</sub>**

|                                                              |                                                                                |
|--------------------------------------------------------------|--------------------------------------------------------------------------------|
| Empirical formula                                            | C <sub>15</sub> H <sub>14</sub> GdN <sub>3</sub> O <sub>4</sub> S <sub>3</sub> |
| Formula weight                                               | 553.72                                                                         |
| Temperature/K                                                | 273.15                                                                         |
| Crystal system                                               | monoclinic                                                                     |
| Space group                                                  | <i>P</i> 2 <sub>1</sub> / <i>c</i>                                             |
| <i>a</i> /Å                                                  | 10.0345(7)                                                                     |
| <i>b</i> /Å                                                  | 9.9366(7)                                                                      |
| <i>c</i> /Å                                                  | 19.3797(13)                                                                    |
| $\alpha$ /°                                                  | 90                                                                             |
| $\beta$ /°                                                   | 94.848(2)                                                                      |
| $\gamma$ /°                                                  | 90                                                                             |
| Volume/Å <sup>3</sup>                                        | 1925.4(2)                                                                      |
| <i>Z</i>                                                     | 4                                                                              |
| $\rho$ calc/gcm <sup>3</sup>                                 | 1.910                                                                          |
| $\mu$ /mm <sup>-1</sup>                                      | 3.795                                                                          |
| <i>F</i> (000)                                               | 1076.0                                                                         |
| Crystal size/mm <sup>3</sup>                                 | 0.915 × 0.371 × 0.218                                                          |
| Radiation                                                    | MoK $\alpha$ ( $\lambda$ = 0.71073)                                            |
| 2 $\theta$ range for data collection/°                       | 5.612 to 65.52                                                                 |
| Index ranges                                                 | -15 ≤ <i>h</i> ≤ 15, -15 ≤ <i>k</i> ≤ 15, -29 ≤ <i>l</i> ≤ 29                  |
| Reflections collected                                        | 96150                                                                          |
| Independent reflections                                      | 6892 [R <sub>int</sub> = 0.0512, R <sub>sigma</sub> = 0.0279]                  |
| Data/restraints/parameters                                   | 6892/54/236                                                                    |
| Goodness-of-fit on <i>F</i> <sup>2</sup>                     | 1.091                                                                          |
| Final <i>R</i> indexes [ <i>I</i> ≥ 2 $\sigma$ ( <i>I</i> )] | <i>R</i> 1 = 0.0336, <i>wR</i> 2 = 0.0569                                      |
| Final <i>R</i> indexes [all data]                            | <i>R</i> 1 = 0.0532, <i>wR</i> 2 = 0.0628                                      |
| Largest diff. peak/hole / e Å <sup>-3</sup>                  | 1.22/-0.66                                                                     |



| Table S13 Bond Lengths for [Gd(mpo) <sub>2</sub> ( $\mu$ -O-mpo)(H <sub>2</sub> O)] <sub>2</sub> |      |             |      |      |            |
|--------------------------------------------------------------------------------------------------|------|-------------|------|------|------------|
| Atom                                                                                             | Atom | Length/Å    | Atom | Atom | Length/Å   |
| Gd1                                                                                              | S1   | 2.9034 (8)  | N2   | C10  | 1.352 (5)  |
| Gd1                                                                                              | S3   | 2.9316 (8)  | N2   | C6   | 1.355 (6)  |
| Gd1                                                                                              | S2   | 2.8241 (10) | N1   | C1   | 1.355 (4)  |
| Gd1                                                                                              | O31  | 2.4484 (18) | N1   | C5   | 1.353 (4)  |
| Gd1                                                                                              | O3   | 2.4511 (18) | C15  | C14  | 1.364 (5)  |
| Gd1                                                                                              | O2   | 2.293 (2)   | C14  | C13  | 1.372 (7)  |
| Gd1                                                                                              | O4   | 2.386 (2)   | C12  | C11  | 1.407 (4)  |
| Gd1                                                                                              | O1   | 2.296 (2)   | C12  | C13  | 1.364 (6)  |
| S1                                                                                               | C1   | 1.708 (3)   | C1   | C2   | 1.397 (4)  |
| S3                                                                                               | C11  | 1.720 (4)   | C5   | C4   | 1.354 (5)  |
| S2                                                                                               | C6   | 1.711 (5)   | C10  | C9   | 1.350 (7)  |
| O3                                                                                               | N3   | 1.360 (3)   | C6   | C7   | 1.403 (6)  |
| O2                                                                                               | N2   | 1.327 (4)   | C2   | C3   | 1.364 (5)  |
| N3                                                                                               | C15  | 1.347 (4)   | C4   | C3   | 1.378 (5)  |
| N3                                                                                               | C11  | 1.358 (4)   | C9   | C8   | 1.352 (10) |
| O1                                                                                               | N1   | 1.321 (3)   | C7   | C8   | 1.357 (9)  |

<sup>1</sup>1-X,1-Y,1-Z

| <b>Table S14 Crystal data and structure refinement for [Tb(mpo)<sub>2</sub>(<math>\mu</math>-O-mpo)(H<sub>2</sub>O)]<sub>2</sub></b> |                                                                                 |
|--------------------------------------------------------------------------------------------------------------------------------------|---------------------------------------------------------------------------------|
| Empirical formula                                                                                                                    | C <sub>15</sub> H <sub>14</sub> N <sub>3</sub> O <sub>4</sub> S <sub>3</sub> Tb |
| Formula weight                                                                                                                       | 555.39                                                                          |
| Temperature/K                                                                                                                        | 273.15                                                                          |
| Crystal system                                                                                                                       | monoclinic                                                                      |
| Space group                                                                                                                          | <i>P</i> 2 <sub>1</sub> / <i>c</i>                                              |
| <i>a</i> /Å                                                                                                                          | 10.061(3)                                                                       |
| <i>b</i> /Å                                                                                                                          | 9.949(3)                                                                        |
| <i>c</i> /Å                                                                                                                          | 19.421(5)                                                                       |
| $\alpha$ /°                                                                                                                          | 90                                                                              |
| $\beta$ /°                                                                                                                           | 94.797(7)                                                                       |
| $\gamma$ /°                                                                                                                          | 90                                                                              |
| Volume/Å <sup>3</sup>                                                                                                                | 1937.2(9)                                                                       |
| <i>Z</i>                                                                                                                             | 4                                                                               |
| $\rho$ calc/g/cm <sup>3</sup>                                                                                                        | 1.904                                                                           |
| $\mu$ /mm <sup>-1</sup>                                                                                                              | 3.999                                                                           |
| <i>F</i> (000)                                                                                                                       | 1080.0                                                                          |
| Crystal size/mm <sup>3</sup>                                                                                                         | 0.422 × 0.246 × 0.203                                                           |
| Radiation                                                                                                                            | MoK $\alpha$ ( $\lambda$ = 0.71073)                                             |
| 2 $\theta$ range for data collection/°                                                                                               | 5.602 to 55.174                                                                 |
| Index ranges                                                                                                                         | -13 ≤ <i>h</i> ≤ 13, -12 ≤ <i>k</i> ≤ 12, -25 ≤ <i>l</i> ≤ 25                   |
| Reflections collected                                                                                                                | 101200                                                                          |
| Independent reflections                                                                                                              | 4455 [R <sub>int</sub> = 0.0331, R <sub>sigma</sub> = 0.0097]                   |
| Data/restraints/parameters                                                                                                           | 4455/0/240                                                                      |
| Goodness-of-fit on <i>F</i> <sup>2</sup>                                                                                             | 1.149                                                                           |
| Final <i>R</i> indexes [ <i>I</i> ≥ 2 $\sigma$ ( <i>I</i> )]                                                                         | <i>R</i> 1 = 0.0183, <i>wR</i> 2 = 0.0442                                       |
| Final <i>R</i> indexes [all data]                                                                                                    | <i>R</i> 1 = 0.0194, <i>wR</i> 2 = 0.0452                                       |
| Largest diff. peak/hole / e Å <sup>-3</sup>                                                                                          | 0.49/-0.83                                                                      |

**Table S15 Bond Lengths for [Tb(mpo)<sub>2</sub>( $\mu$ -O-mpo)(H<sub>2</sub>O)]<sub>2</sub>**

| <b>Atom</b> | <b>Atom</b> | <b>Length/Å</b> | <b>Atom</b> | <b>Atom</b> | <b>Length/Å</b> |
|-------------|-------------|-----------------|-------------|-------------|-----------------|
| Tb1         | S1          | 2.9083 (9)      | N1          | C1          | 1.359 (3)       |
| Tb1         | S3          | 2.9334 (9)      | N1          | C5          | 1.357 (3)       |
| Tb1         | S2          | 2.8169 (10)     | N2          | C6          | 1.359 (4)       |
| Tb1         | O3          | 2.4457 (16)     | N2          | C10         | 1.357 (4)       |
| Tb1         | O31         | 2.4473 (16)     | C15         | C14         | 1.381 (4)       |
| Tb1         | O4          | 2.3799 (18)     | C1          | C2          | 1.417 (3)       |
| Tb1         | O2          | 2.2836 (17)     | C2          | C3          | 1.370 (4)       |
| Tb1         | O1          | 2.285 (2)       | C11         | C12         | 1.409 (4)       |
| S1          | C1          | 1.706 (2)       | C12         | C13         | 1.369 (5)       |
| S3          | C11         | 1.725 (3)       | C14         | C13         | 1.381 (6)       |
| S2          | C6          | 1.719 (4)       | C3          | C4          | 1.384 (4)       |
| O3          | N3          | 1.361 (2)       | C5          | C4          | 1.358 (4)       |
| O2          | N2          | 1.332 (3)       | C6          | C7          | 1.405 (4)       |
| N3          | C15         | 1.348 (3)       | C10         | C9          | 1.366 (6)       |
| N3          | C11         | 1.366 (3)       | C7          | C8          | 1.367 (7)       |
| O1          | N1          | 1.330 (3)       | C9          | C8          | 1.348 (9)       |

<sup>1</sup>1-X,1-Y,1-Z

**Table S16 Crystal data and structure refinement for Dy(mpo)<sub>3</sub>(H<sub>2</sub>O)<sub>2</sub>•H<sub>2</sub>O**

|                                             |                                                                                |
|---------------------------------------------|--------------------------------------------------------------------------------|
| Empirical formula                           | C <sub>15</sub> H <sub>18</sub> DyN <sub>3</sub> O <sub>6</sub> S <sub>3</sub> |
| Formula weight                              | 595.00                                                                         |
| Temperature/K                               | 296.15                                                                         |
| Crystal system                              | triclinic                                                                      |
| Space group                                 | <i>P</i> 1                                                                     |
| a/Å                                         | 7.4805(9)                                                                      |
| b/Å                                         | 11.1541(15)                                                                    |
| c/Å                                         | 13.1843(17)                                                                    |
| α/°                                         | 111.472(3)                                                                     |
| β/°                                         | 93.931(3)                                                                      |
| γ/°                                         | 91.055(3)                                                                      |
| Volume/Å <sup>3</sup>                       | 1020.2(2)                                                                      |
| Z                                           | 2                                                                              |
| ρ <sub>calc</sub> /cm <sup>3</sup>          | 1.937                                                                          |
| μ/mm <sup>-1</sup>                          | 4.006                                                                          |
| F(000)                                      | 582.0                                                                          |
| Crystal size/mm <sup>3</sup>                | 0.668 × 0.334 × 0.182                                                          |
| Radiation                                   | MoK <sub>α</sub> (λ = 0.71073)                                                 |
| 2θ range for data collection/°              | 5.464 to 67.152                                                                |
| Index ranges                                | -11 ≤ h ≤ 11, -17 ≤ k ≤ 17, -20 ≤ l ≤ 20                                       |
| Reflections collected                       | 58168                                                                          |
| Independent reflections                     | 7556 [R <sub>int</sub> = 0.0650, R <sub>sigma</sub> = 0.0331]                  |
| Data/restraints/parameters                  | 7556/1/260                                                                     |
| Goodness-of-fit on F <sup>2</sup>           | 1.121                                                                          |
| Final R indexes [I ≥ 2σ (I)]                | R1 = 0.0312, wR2 = 0.0722                                                      |
| Final R indexes [all data]                  | R1 = 0.0385, wR2 = 0.0771                                                      |
| Largest diff. peak/hole / e Å <sup>-3</sup> | 1.58/-1.94                                                                     |

**Table S17 Bond Lengths for Dy(mpo)<sub>3</sub>(H<sub>2</sub>O)<sub>2</sub>•H<sub>2</sub>O**

| Atom | Atom | Length/Å   | Atom | Atom | Length/Å  |
|------|------|------------|------|------|-----------|
| Dy01 | S2   | 2.7998 (9) | N1   | C1   | 1.372 (4) |
| Dy01 | S3   | 2.8642 (9) | N1   | C5   | 1.363 (4) |
| Dy01 | S1   | 2.8246 (9) | N2   | C6   | 1.379 (4) |
| Dy01 | O1   | 2.343 (2)  | N2   | C10  | 1.357 (4) |
| Dy01 | O2   | 2.360 (2)  | C1   | C2   | 1.411 (4) |
| Dy01 | O5   | 2.392 (2)  | C11  | C12  | 1.418 (5) |
| Dy01 | O4   | 2.389 (2)  | C15  | C14  | 1.370 (6) |
| Dy01 | O3   | 2.335 (2)  | C6   | C7   | 1.401 (5) |
| S2   | C6   | 1.712 (4)  | C5   | C4   | 1.367 (5) |
| S3   | C11  | 1.705 (4)  | C2   | C3   | 1.373 (6) |
| S1   | C1   | 1.714 (3)  | C14  | C13  | 1.384 (8) |
| O1   | N1   | 1.349 (3)  | C12  | C13  | 1.370 (7) |
| O2   | N2   | 1.347 (3)  | C4   | C3   | 1.389 (6) |
| O3   | N3   | 1.348 (3)  | C10  | C9   | 1.370 (5) |
| N3   | C11  | 1.370 (4)  | C7   | C8   | 1.367 (7) |
| N3   | C15  | 1.359 (4)  | C8   | C9   | 1.386 (7) |

**Table S18 Crystal data and structure refinement for Ho(mpo)<sub>3</sub>(H<sub>2</sub>O)<sub>2</sub>•H<sub>2</sub>O**

|                                                              |                                                                                |
|--------------------------------------------------------------|--------------------------------------------------------------------------------|
| Empirical formula                                            | C <sub>15</sub> H <sub>18</sub> HoN <sub>3</sub> O <sub>6</sub> S <sub>3</sub> |
| Formula weight                                               | 597.43                                                                         |
| Temperature/K                                                | 296.15                                                                         |
| Crystal system                                               | triclinic                                                                      |
| Space group                                                  | <i>P</i> 1                                                                     |
| <i>a</i> /Å                                                  | 7.4507(8)                                                                      |
| <i>b</i> /Å                                                  | 11.1249(13)                                                                    |
| <i>c</i> /Å                                                  | 13.1555(16)                                                                    |
| $\alpha$ /°                                                  | 111.452(3)                                                                     |
| $\beta$ /°                                                   | 93.982(3)                                                                      |
| $\gamma$ /°                                                  | 91.030(3)                                                                      |
| Volume/Å <sup>3</sup>                                        | 1011.3(2)                                                                      |
| <i>Z</i>                                                     | 2                                                                              |
| $\rho$ calc/gcm <sup>3</sup>                                 | 1.962                                                                          |
| $\mu$ /mm <sup>-1</sup>                                      | 4.258                                                                          |
| <i>F</i> (000)                                               | 584.0                                                                          |
| Crystal size/mm <sup>3</sup>                                 | 0.425 × 0.237 × 0.115                                                          |
| Radiation                                                    | MoK $\alpha$ ( $\lambda$ = 0.71073)                                            |
| 2 $\theta$ range for data collection/°                       | 5.486 to 56.464                                                                |
| Index ranges                                                 | -8 ≤ <i>h</i> ≤ 9, -14 ≤ <i>k</i> ≤ 14, -16 ≤ <i>l</i> ≤ 17                    |
| Reflections collected                                        | 32658                                                                          |
| Independent reflections                                      | 4439 [R <sub>int</sub> = 0.0586, R <sub>sigma</sub> = 0.0416]                  |
| Data/restraints/parameters                                   | 4439/1/260                                                                     |
| Goodness-of-fit on <i>F</i> <sup>2</sup>                     | 1.131                                                                          |
| Final <i>R</i> indexes [ <i>I</i> ≥ 2 $\sigma$ ( <i>I</i> )] | <i>R</i> 1 = 0.0269, <i>wR</i> 2 = 0.0457                                      |
| Final <i>R</i> indexes [all data]                            | <i>R</i> 1 = 0.0402, <i>wR</i> 2 = 0.0486                                      |
| Largest diff. peak/hole / e Å <sup>-3</sup>                  | 0.84/-0.92                                                                     |

**Table S19 Bond Lengths for Ho(mpo)<sub>3</sub>(H<sub>2</sub>O)<sub>2</sub>•H<sub>2</sub>O**

| Atom | Atom | Length/Å   | Atom | Atom | Length/Å  |
|------|------|------------|------|------|-----------|
| Ho01 | S3   | 2.8522 (9) | N2   | C6   | 1.371 (4) |
| Ho01 | S1   | 2.7847 (9) | N2   | C10  | 1.353 (4) |
| Ho01 | S2   | 2.8108 (9) | N1   | C1   | 1.367 (4) |
| Ho01 | O1   | 2.344 (2)  | N1   | C5   | 1.354 (4) |
| Ho01 | O2   | 2.330 (2)  | C11  | C12  | 1.401 (5) |
| Ho01 | O4   | 2.366 (2)  | C6   | C7   | 1.406 (5) |
| Ho01 | O5   | 2.370 (2)  | C10  | C9   | 1.358 (5) |
| Ho01 | O3   | 2.321 (2)  | C15  | C14  | 1.362 (5) |
| S3   | C11  | 1.707 (4)  | C1   | C2   | 1.405 (5) |
| S1   | C1   | 1.709 (4)  | C5   | C4   | 1.361 (5) |
| S2   | C6   | 1.708 (4)  | C14  | C13  | 1.379 (6) |
| O1   | N1   | 1.349 (3)  | C12  | C13  | 1.357 (6) |
| O2   | N2   | 1.349 (3)  | C7   | C8   | 1.360 (5) |
| O3   | N3   | 1.344 (3)  | C9   | C8   | 1.385 (5) |
| N3   | C11  | 1.370 (4)  | C2   | C3   | 1.360 (6) |
| N3   | C15  | 1.351 (4)  | C4   | C3   | 1.374 (6) |

**Table S20 Crystal data and structure refinement for Er(mpo)<sub>3</sub>(H<sub>2</sub>O)<sub>2</sub>•H<sub>2</sub>O**

|                                                              |                                                                                               |
|--------------------------------------------------------------|-----------------------------------------------------------------------------------------------|
| Empirical formula                                            | C <sub>30</sub> H <sub>36</sub> Er <sub>2</sub> N <sub>6</sub> O <sub>12</sub> S <sub>6</sub> |
| Formula weight                                               | 1199.53                                                                                       |
| Temperature/K                                                | 296.15                                                                                        |
| Crystal system                                               | triclinic                                                                                     |
| Space group                                                  | <i>P</i> 1                                                                                    |
| <i>a</i> /Å                                                  | 7.44370(10)                                                                                   |
| <i>b</i> /Å                                                  | 11.0980(2)                                                                                    |
| <i>c</i> /Å                                                  | 13.1205(2)                                                                                    |
| $\alpha$ /°                                                  | 111.4100(10)                                                                                  |
| $\beta$ /°                                                   | 94.0230(10)                                                                                   |
| $\gamma$ /°                                                  | 91.0700(10)                                                                                   |
| Volume/Å <sup>3</sup>                                        | 1005.46(3)                                                                                    |
| <i>Z</i>                                                     | 1                                                                                             |
| $\rho$ calc/gcm <sup>3</sup>                                 | 1.981                                                                                         |
| $\mu$ /mm <sup>-1</sup>                                      | 4.522                                                                                         |
| <i>F</i> (000)                                               | 586.0                                                                                         |
| Crystal size/mm <sup>3</sup>                                 | 0.563 × 0.34 × 0.258                                                                          |
| Radiation                                                    | MoK $\alpha$ ( $\lambda$ = 0.71073)                                                           |
| 2 $\theta$ range for data collection/°                       | 3.946 to 92.952                                                                               |
| Index ranges                                                 | -15 ≤ <i>h</i> ≤ 15, -22 ≤ <i>k</i> ≤ 22, -26 ≤ <i>l</i> ≤ 26                                 |
| Reflections collected                                        | 178231                                                                                        |
| Independent reflections                                      | 17847 [R <sub>int</sub> = 0.0522, R <sub>sigma</sub> = 0.0296]                                |
| Data/restraints/parameters                                   | 17847/1/264                                                                                   |
| Goodness-of-fit on <i>F</i> <sup>2</sup>                     | 1.019                                                                                         |
| Final <i>R</i> indexes [ <i>I</i> ≥ 2 $\sigma$ ( <i>I</i> )] | R1 = 0.0291, wR2 = 0.0485                                                                     |
| Final <i>R</i> indexes [all data]                            | R1 = 0.0452, wR2 = 0.0525                                                                     |
| Largest diff. peak/hole / e Å <sup>-3</sup>                  | 1.08/-1.10                                                                                    |

**Table S21 Bond Lengths for Er(mpo)<sub>3</sub>(H<sub>2</sub>O)<sub>2</sub>•H<sub>2</sub>O**

| Atom | Atom | Length/Å    | Atom | Atom | Length/Å    |
|------|------|-------------|------|------|-------------|
| Er1  | S3   | 2.8413 (4)  | N3   | C11  | 1.3665 (19) |
| Er1  | S2   | 2.7693 (4)  | N3   | C15  | 1.355 (2)   |
| Er1  | S1   | 2.7935 (4)  | N2   | C6   | 1.3657 (19) |
| Er1  | O2   | 2.3327 (10) | N2   | C10  | 1.3519 (19) |
| Er1  | O1   | 2.3186 (10) | C1   | C2   | 1.409 (2)   |
| Er1  | O4   | 2.3565 (10) | C11  | C12  | 1.413 (2)   |
| Er1  | O3   | 2.3143 (10) | C6   | C7   | 1.405 (2)   |
| Er1  | O5   | 2.3604 (10) | C15  | C14  | 1.366 (3)   |
| S3   | C11  | 1.7042 (16) | C5   | C4   | 1.367 (2)   |
| S2   | C6   | 1.7083 (17) | C10  | C9   | 1.369 (2)   |
| S1   | C1   | 1.7060 (16) | C2   | C3   | 1.360 (3)   |
| O2   | N2   | 1.3443 (14) | C4   | C3   | 1.390 (3)   |
| O1   | N1   | 1.3452 (15) | C12  | C13  | 1.362 (3)   |
| O3   | N3   | 1.3410 (15) | C14  | C13  | 1.385 (4)   |
| N1   | C1   | 1.3674 (18) | C9   | C8   | 1.379 (4)   |
| N1   | C5   | 1.3513 (19) | C7   | C8   | 1.361 (3)   |

**Table S22 Crystal data and structure refinement for Tm(mpo)<sub>3</sub>(H<sub>2</sub>O)<sub>2</sub>•H<sub>2</sub>O**

|                                                              |                                                                                 |
|--------------------------------------------------------------|---------------------------------------------------------------------------------|
| Empirical formula                                            | C <sub>15</sub> H <sub>18</sub> N <sub>3</sub> O <sub>6</sub> S <sub>3</sub> Tm |
| Formula weight                                               | 601.43                                                                          |
| Temperature/K                                                | 273.15                                                                          |
| Crystal system                                               | triclinic                                                                       |
| Space group                                                  | <i>P</i> 1                                                                      |
| <i>a</i> /Å                                                  | 7.4398(9)                                                                       |
| <i>b</i> /Å                                                  | 11.1083(14)                                                                     |
| <i>c</i> /Å                                                  | 13.1269(16)                                                                     |
| $\alpha$ /°                                                  | 111.312(3)                                                                      |
| $\beta$ /°                                                   | 94.019(3)                                                                       |
| $\gamma$ /°                                                  | 91.182(3)                                                                       |
| Volume/Å <sup>3</sup>                                        | 1006.9(2)                                                                       |
| <i>Z</i>                                                     | 2                                                                               |
| $\rho$ calc/gcm <sup>3</sup>                                 | 1.984                                                                           |
| $\mu$ /mm <sup>-1</sup>                                      | 4.754                                                                           |
| <i>F</i> (000)                                               | 588.0                                                                           |
| Crystal size/mm <sup>3</sup>                                 | 0.539 × 0.24 × 0.171                                                            |
| Radiation                                                    | MoK $\alpha$ ( $\lambda$ = 0.71073)                                             |
| 2 $\theta$ range for data collection/°                       | 5.496 to 57.538                                                                 |
| Index ranges                                                 | -10 ≤ <i>h</i> ≤ 10, -15 ≤ <i>k</i> ≤ 15, -17 ≤ <i>l</i> ≤ 17                   |
| Reflections collected                                        | 15505                                                                           |
| Independent reflections                                      | 5179 [R <sub>int</sub> = 0.0342, R <sub>sigma</sub> = 0.0331]                   |
| Data/restraints/parameters                                   | 5179/0/258                                                                      |
| Goodness-of-fit on <i>F</i> <sup>2</sup>                     | 1.184                                                                           |
| Final <i>R</i> indexes [ <i>I</i> ≥ 2 $\sigma$ ( <i>I</i> )] | <i>R</i> 1 = 0.0232, <i>wR</i> 2 = 0.0560                                       |
| Final <i>R</i> indexes [all data]                            | <i>R</i> 1 = 0.0264, <i>wR</i> 2 = 0.0587                                       |
| Largest diff. peak/hole / e Å <sup>-3</sup>                  | 0.82/-1.03                                                                      |

**Table S23 Bond Lengths for Tm(mpo)<sub>3</sub>(H<sub>2</sub>O)<sub>2</sub>•H<sub>2</sub>O**

| Atom | Atom | Length/Å   | Atom | Atom | Length/Å  |
|------|------|------------|------|------|-----------|
| Tm1  | S3   | 2.8371 (9) | N1   | C1   | 1.373 (4) |
| Tm1  | S1   | 2.7662 (9) | N1   | C5   | 1.359 (4) |
| Tm1  | S2   | 2.7854 (9) | N2   | C6   | 1.369 (4) |
| Tm1  | O1   | 2.325 (2)  | N2   | C10  | 1.358 (4) |
| Tm1  | O2   | 2.312 (2)  | C1   | C2   | 1.398 (5) |
| Tm1  | O5   | 2.349 (2)  | C11  | C12  | 1.412 (5) |
| Tm1  | O3   | 2.306 (2)  | C6   | C7   | 1.407 (5) |
| Tm1  | O4   | 2.353 (2)  | C15  | C14  | 1.367 (5) |
| S3   | C11  | 1.704 (4)  | C5   | C4   | 1.361 (5) |
| S1   | C1   | 1.709 (4)  | C10  | C9   | 1.366 (5) |
| S2   | C6   | 1.711 (4)  | C14  | C13  | 1.384 (7) |
| O1   | N1   | 1.346 (3)  | C7   | C8   | 1.370 (6) |
| O2   | N2   | 1.350 (3)  | C2   | C3   | 1.363 (6) |
| O3   | N3   | 1.343 (3)  | C12  | C13  | 1.364 (6) |
| N3   | C11  | 1.371 (4)  | C9   | C8   | 1.387 (6) |
| N3   | C15  | 1.356 (4)  | C4   | C3   | 1.390 (7) |

**Table S24 Crystal data and structure refinement for Yb(mpo)<sub>3</sub>(H<sub>2</sub>O)<sub>2</sub>•H<sub>2</sub>O**

|                                                              |                                                                                 |
|--------------------------------------------------------------|---------------------------------------------------------------------------------|
| Empirical formula                                            | C <sub>15</sub> H <sub>18</sub> N <sub>3</sub> O <sub>6</sub> S <sub>3</sub> Yb |
| Formula weight                                               | 605.54                                                                          |
| Temperature/K                                                | 296.15                                                                          |
| Crystal system                                               | triclinic                                                                       |
| Space group                                                  | <i>P</i> 1                                                                      |
| <i>a</i> /Å                                                  | 7.4273(3)                                                                       |
| <i>b</i> /Å                                                  | 11.0844(4)                                                                      |
| <i>c</i> /Å                                                  | 13.0835(5)                                                                      |
| $\alpha$ /°                                                  | 111.299(2)                                                                      |
| $\beta$ /°                                                   | 94.085(2)                                                                       |
| $\gamma$ /°                                                  | 91.071(2)                                                                       |
| Volume/Å <sup>3</sup>                                        | 999.86(7)                                                                       |
| <i>Z</i>                                                     | 2                                                                               |
| $\rho$ calc/gcm <sup>3</sup>                                 | 2.011                                                                           |
| $\mu$ /mm <sup>-1</sup>                                      | 5.027                                                                           |
| <i>F</i> (000)                                               | 590.0                                                                           |
| Crystal size/mm <sup>3</sup>                                 | 0.243 × 0.2 × 0.188                                                             |
| Radiation                                                    | MoK $\alpha$ ( $\lambda$ = 0.71073)                                             |
| 2 $\theta$ range for data collection/°                       | 3.948 to 63.422                                                                 |
| Index ranges                                                 | -10 ≤ <i>h</i> ≤ 10, -16 ≤ <i>k</i> ≤ 16, -19 ≤ <i>l</i> ≤ 19                   |
| Reflections collected                                        | 81495                                                                           |
| Independent reflections                                      | 6745 [R <sub>int</sub> = 0.0444, R <sub>sigma</sub> = 0.0192]                   |
| Data/restraints/parameters                                   | 6745/0/272                                                                      |
| Goodness-of-fit on <i>F</i> <sup>2</sup>                     | 1.101                                                                           |
| Final <i>R</i> indexes [ <i>I</i> ≥ 2 $\sigma$ ( <i>I</i> )] | <i>R</i> 1 = 0.0204, <i>wR</i> 2 = 0.0499                                       |
| Final <i>R</i> indexes [all data]                            | <i>R</i> 1 = 0.0235, <i>wR</i> 2 = 0.0511                                       |
| Largest diff. peak/hole / e Å <sup>-3</sup>                  | 1.35/-0.88                                                                      |

**Table S25 Bond Lengths for Yb(mpo)<sub>3</sub>(H<sub>2</sub>O)<sub>2</sub>•H<sub>2</sub>O**

| Atom | Atom | Length/Å    | Atom | Atom | Length/Å  |
|------|------|-------------|------|------|-----------|
| Yb1  | S3   | 2.8301 (7)  | N1   | C1   | 1.368 (3) |
| Yb1  | S2   | 2.7496 (7)  | N1   | C5   | 1.354 (3) |
| Yb1  | S1   | 2.7714 (7)  | N2   | C6   | 1.355 (3) |
| Yb1  | O2   | 2.3122 (17) | N2   | C10  | 1.357 (4) |
| Yb1  | O1   | 2.2967 (18) | C11  | C12  | 1.409 (4) |
| Yb1  | O4   | 2.3317 (19) | C1   | C2   | 1.414 (4) |
| Yb1  | O3   | 2.2953 (18) | C5   | C4   | 1.376 (4) |
| Yb1  | O5   | 2.341 (2)   | C6   | C7   | 1.412 (4) |
| S3   | C11  | 1.703 (3)   | C10  | C9   | 1.369 (4) |
| S2   | C6   | 1.708 (3)   | C15  | C14  | 1.364 (4) |
| S1   | C1   | 1.705 (3)   | C14  | C13  | 1.389 (6) |
| O2   | N2   | 1.350 (3)   | C2   | C3   | 1.358 (5) |
| O1   | N1   | 1.349 (3)   | C4   | C3   | 1.381 (5) |
| O3   | N3   | 1.336 (3)   | C12  | C13  | 1.361 (5) |
| N3   | C11  | 1.371 (3)   | C9   | C8   | 1.377 (6) |
| N3   | C15  | 1.355 (3)   | C8   | C7   | 1.360 (5) |



**Table S26 Crystal data and structure refinement for Lu(mpo)<sub>3</sub>(H<sub>2</sub>O)<sub>2</sub>•H<sub>2</sub>O**

|                                                              |                                                                                |
|--------------------------------------------------------------|--------------------------------------------------------------------------------|
| Empirical formula                                            | C <sub>15</sub> H <sub>19</sub> LuN <sub>3</sub> O <sub>6</sub> S <sub>3</sub> |
| Formula weight                                               | 608.48                                                                         |
| Temperature/K                                                | 273.15                                                                         |
| Crystal system                                               | triclinic                                                                      |
| Space group                                                  | <i>P</i> 1                                                                     |
| <i>a</i> /Å                                                  | 7.4092(3)                                                                      |
| <i>b</i> /Å                                                  | 11.0676(5)                                                                     |
| <i>c</i> /Å                                                  | 13.0778(6)                                                                     |
| $\alpha$ /°                                                  | 111.325(2)                                                                     |
| $\beta$ /°                                                   | 94.072(2)                                                                      |
| $\gamma$ /°                                                  | 91.141(2)                                                                      |
| Volume/Å <sup>3</sup>                                        | 995.25(8)                                                                      |
| <i>Z</i>                                                     | 2                                                                              |
| $\rho$ calc/gcm <sup>3</sup>                                 | 2.030                                                                          |
| $\mu$ /mm <sup>-1</sup>                                      | 5.312                                                                          |
| <i>F</i> (000)                                               | 594.0                                                                          |
| Crystal size/mm <sup>3</sup>                                 | 0.465 × 0.248 × 0.166                                                          |
| Radiation                                                    | MoK $\alpha$ ( $\lambda$ = 0.71073)                                            |
| 2 $\theta$ range for data collection/°                       | 5.518 to 55.124                                                                |
| Index ranges                                                 | -9 ≤ <i>h</i> ≤ 9, -14 ≤ <i>k</i> ≤ 14, -16 ≤ <i>l</i> ≤ 16                    |
| Reflections collected                                        | 72598                                                                          |
| Independent reflections                                      | 4577 [R <sub>int</sub> = 0.0548, R <sub>sigma</sub> = 0.0190]                  |
| Data/restraints/parameters                                   | 4577/1/264                                                                     |
| Goodness-of-fit on <i>F</i> <sup>2</sup>                     | 1.086                                                                          |
| Final <i>R</i> indexes [ <i>I</i> ≥ 2 $\sigma$ ( <i>I</i> )] | <i>R</i> 1 = 0.0167, <i>wR</i> 2 = 0.0393                                      |
| Final <i>R</i> indexes [all data]                            | <i>R</i> 1 = 0.0194, <i>wR</i> 2 = 0.0408                                      |
| Largest diff. peak/hole / e Å <sup>-3</sup>                  | 0.91/-0.66                                                                     |

**Table S27 Bond Lengths for Lu(mpo)<sub>3</sub>(H<sub>2</sub>O)<sub>2</sub>•H<sub>2</sub>O**

| Atom | Atom | Length/Å    | Atom | Atom | Length/Å  |
|------|------|-------------|------|------|-----------|
| Lu1  | S3   | 2.8224 (7)  | N2   | C10  | 1.345 (3) |
| Lu1  | S1   | 2.7405 (7)  | N2   | C6   | 1.369 (3) |
| Lu1  | S2   | 2.7611 (7)  | N1   | C1   | 1.365 (3) |
| Lu1  | O2   | 2.2920 (18) | N1   | C5   | 1.354 (3) |
| Lu1  | O1   | 2.3029 (16) | C11  | C12  | 1.404 (4) |
| Lu1  | O4   | 2.3206 (17) | C10  | C9   | 1.370 (4) |
| Lu1  | O3   | 2.2888 (17) | C15  | C14  | 1.363 (4) |
| Lu1  | O5   | 2.3243 (18) | C1   | C2   | 1.405 (4) |
| S3   | C11  | 1.702 (3)   | C6   | C7   | 1.406 (4) |
| S1   | C1   | 1.706 (3)   | C5   | C4   | 1.362 (4) |
| S2   | C6   | 1.704 (3)   | C14  | C13  | 1.383 (5) |
| O2   | N2   | 1.347 (3)   | C12  | C13  | 1.356 (5) |
| O1   | N1   | 1.344 (2)   | C9   | C8   | 1.384 (5) |
| O3   | N3   | 1.340 (3)   | C7   | C8   | 1.368 (5) |
| N3   | C11  | 1.369 (3)   | C2   | C3   | 1.357 (5) |
| N3   | C15  | 1.354 (3)   | C4   | C3   | 1.378 (6) |

**Table S28 Crystal data and structure refinement for [Am(mpo)<sub>2</sub>( $\mu$ -O-mpo)(H<sub>2</sub>O)]<sub>2</sub>•3H<sub>2</sub>O**

|                                             |                                                                                |
|---------------------------------------------|--------------------------------------------------------------------------------|
| Empirical formula                           | C <sub>15</sub> H <sub>20</sub> AmN <sub>3</sub> O <sub>7</sub> S <sub>3</sub> |
| Formula weight                              | 693.52                                                                         |
| Temperature/K                               | 100.15                                                                         |
| Crystal system                              | triclinic                                                                      |
| Space group                                 | <i>P</i> 1                                                                     |
| a/Å                                         | 8.3942(10)                                                                     |
| b/Å                                         | 9.6982(10)                                                                     |
| c/Å                                         | 13.6896(18)                                                                    |
| $\alpha$ /°                                 | 92.332(5)                                                                      |
| $\beta$ /°                                  | 107.744(4)                                                                     |
| $\gamma$ /°                                 | 92.932(3)                                                                      |
| Volume/Å <sup>3</sup>                       | 1058.2(2)                                                                      |
| Z                                           | 2                                                                              |
| $\rho$ calc/g/cm <sup>3</sup>               | 2.177                                                                          |
| $\mu$ /mm <sup>-1</sup>                     | 3.963                                                                          |
| F(000)                                      | 660.0                                                                          |
| Crystal size/mm <sup>3</sup>                | 0.536 × 0.298 × 0.19                                                           |
| Radiation                                   | MoK $\alpha$ ( $\lambda$ = 0.71073)                                            |
| 2 $\theta$ range for data collection/°      | 5.104 to 56.706                                                                |
| Index ranges                                | -11 ≤ h ≤ 11, -12 ≤ k ≤ 12, -18 ≤ l ≤ 18                                       |
| Reflections collected                       | 54347                                                                          |
| Independent reflections                     | 5265 [R <sub>int</sub> = 0.0711, R <sub>sigma</sub> = 0.0311]                  |
| Data/restraints/parameters                  | 5265/1/274                                                                     |
| Goodness-of-fit on F <sup>2</sup>           | 1.178                                                                          |
| Final R indexes [I ≥ 2 $\sigma$ (I)]        | R1 = 0.0392, wR2 = 0.0960                                                      |
| Final R indexes [all data]                  | R1 = 0.0406, wR2 = 0.0973                                                      |
| Largest diff. peak/hole / e Å <sup>-3</sup> | 2.87/-4.89                                                                     |

**Table S29 Bond Lengths for [Am(mpo)<sub>2</sub>( $\mu$ -O-mpo)(H<sub>2</sub>O)]<sub>2</sub>•3H<sub>2</sub>O**

| Atom | Atom | Length/Å    | Atom | Atom | Length/Å   |
|------|------|-------------|------|------|------------|
| Am1  | S2   | 2.8890 (16) | N1   | C5   | 1.352 (8)  |
| Am1  | S3   | 2.8734 (16) | N1   | C1   | 1.371 (8)  |
| Am1  | S1   | 2.9453 (16) | N2   | C6   | 1.353 (8)  |
| Am1  | O11  | 2.519 (4)   | N2   | C10  | 1.360 (8)  |
| Am1  | O1   | 2.468 (4)   | N3   | C15  | 1.357 (9)  |
| Am1  | O3   | 2.355 (5)   | N3   | C11  | 1.358 (8)  |
| Am1  | O2   | 2.366 (4)   | C5   | C4   | 1.361 (9)  |
| Am1  | N1   | 3.254 (5)   | C6   | C7   | 1.409 (9)  |
| Am1  | N11  | 3.439 (5)   | C7   | C8   | 1.380 (9)  |
| Am1  | O4   | 2.441 (5)   | C15  | C14  | 1.379 (9)  |
| Am1  | N2   | 3.401 (5)   | C11  | C12  | 1.414 (9)  |
| Am1  | N3   | 3.391 (5)   | C8   | C9   | 1.398 (10) |
| S2   | C6   | 1.721 (6)   | C4   | C3   | 1.396 (12) |
| S3   | C11  | 1.713 (7)   | C9   | C10  | 1.357 (10) |
| S1   | C1   | 1.730 (7)   | C14  | C13  | 1.394 (10) |
| O1   | N1   | 1.349 (6)   | C12  | C13  | 1.376 (10) |
| O3   | N3   | 1.337 (6)   | C1   | C2   | 1.414 (9)  |
| O2   | N2   | 1.358 (7)   | C2   | C3   | 1.362 (12) |

<sup>1</sup>1-X,1-Y,1-Z

## $^1\text{H}$ Nuclear Magnetic Resonance Spectroscopy

$^1\text{H}$  NMR spectra of **1-Ln** (Pr, Sm, Nd, Eu) and **2-Ln** (Yb, Lu) were collected in pyridine- $d_5$  as other solvents quickly precipitated the solids, see below. Spectra of **1-Ln** reveals four resonances that correspond with the four distinct resonances present in the major thiol form of pyrrhione. Both **1-Pr** and **1-Nd** show paramagnetic broadening typical of both  $4f^2$  and  $4f^3$  systems ranging from 31 to 21 ppm, respectively. The spectrum of **1-Sm** exhibits peak splitting that is also observable in spectra of the free ligand: two triplets of doublets at 7.11 and 7.22 ppm correspond to aromatic protons meta- to the sulfur and N-oxide groups while the two doublets at 8.00 and 9.79 ppm are assigned to the protons meta- to these chelating moieties. Similarly, spectra of **1-Eu** and **2-Yb** show four, paramagnetically broadened resonances that are shifted upfield at -5.37 and -35.20 ppm, respectively. Paramagnetic shifting of the other **1-Ln** (Gd, Tb) and **2-Ln** (Dy, Ho, Er, Tm) complexes was significant such that no set of resonances are observable. Due to sample constraints and radioactive hazards,  $^1\text{H}$  NMR was unable to be collected on **1-Am**.

Monomeric **2-Ln** contains three symmetric pyrrhionate ligands which yield a single set of resonances, **Figures S17** and **S18**. A single set of resonances is observed in **1-Ln**, which indicates either a dynamic process via monomer-dimer equilibrium or dissociation of the dimers in the solution-state. Future studies using this ligand should investigate the behavior of **2-Ln** in the solution-state using other deuterated, less complexing solvents.

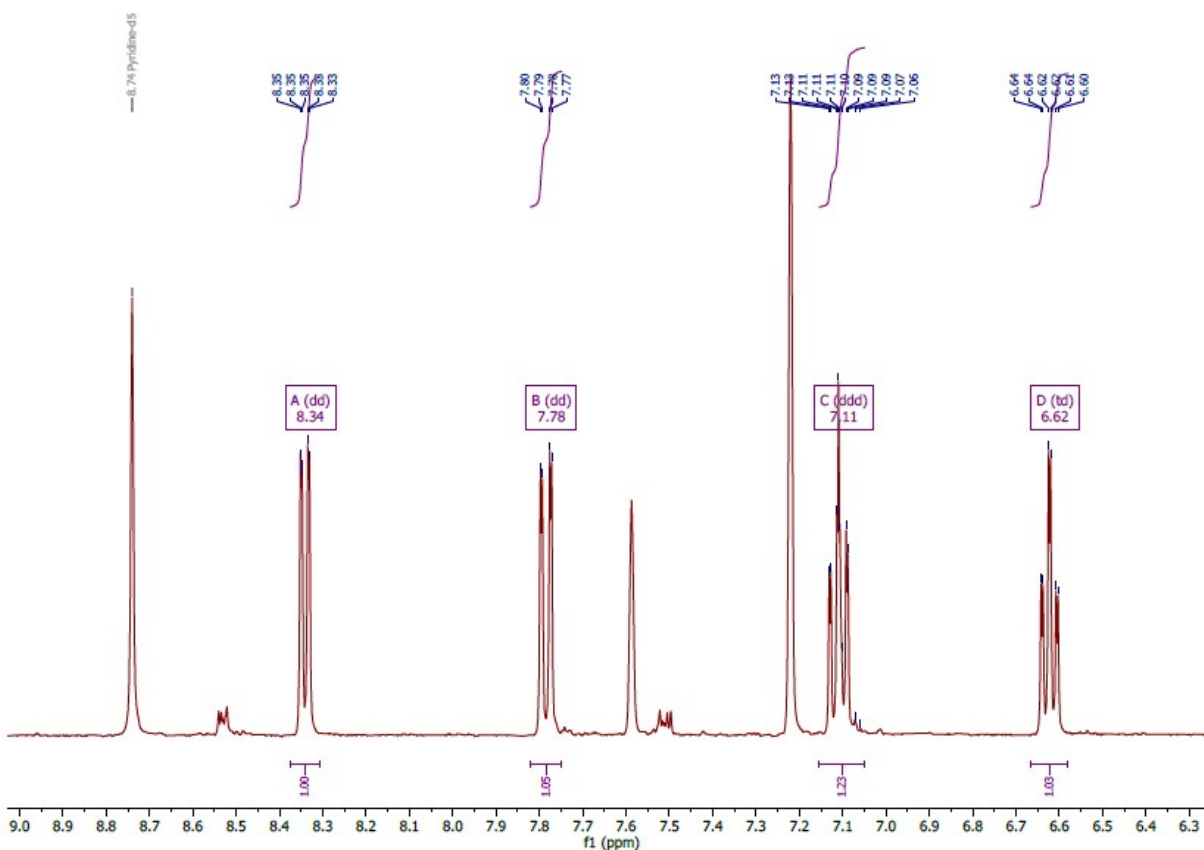

**Figure S14:** Pyrrhione, free ligand

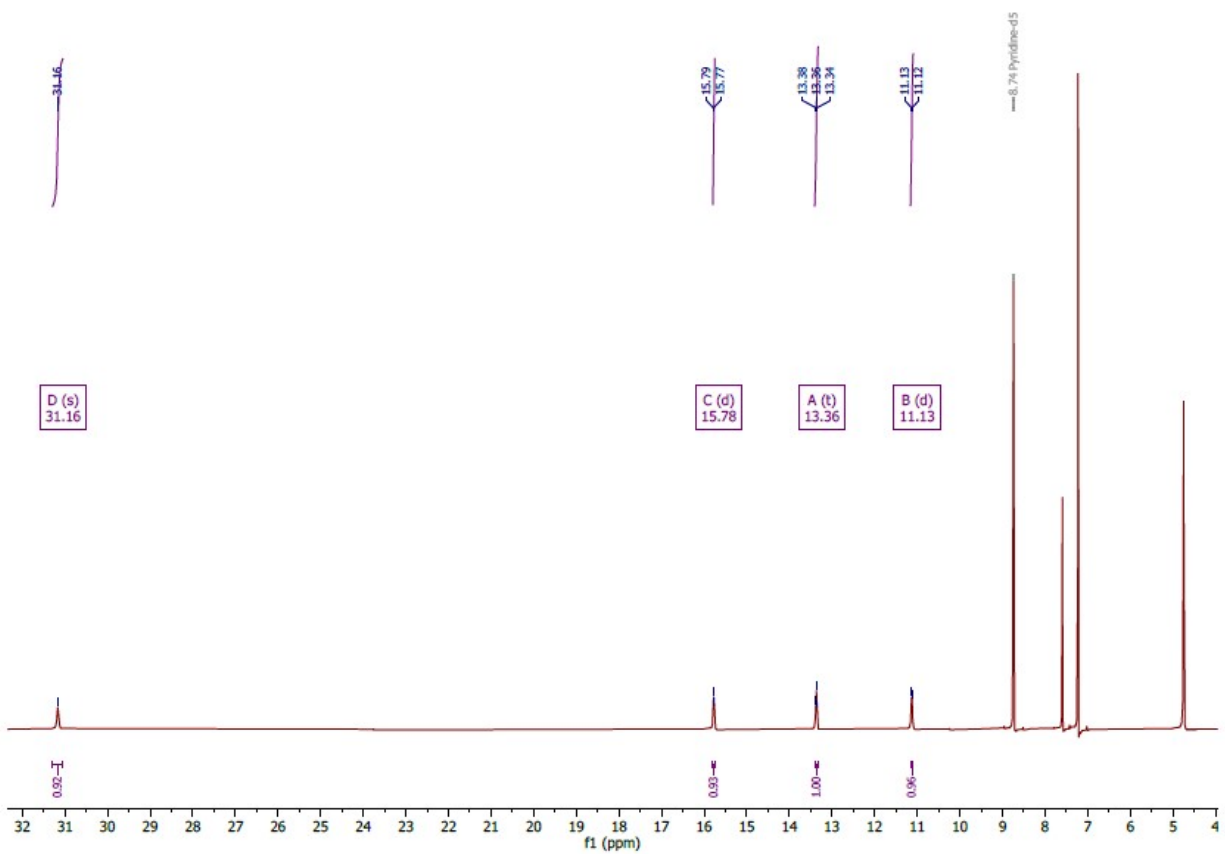

**Figure S15:** [Pr(mpo)<sub>2</sub>(μ-O-mpo)(H<sub>2</sub>O)<sub>2</sub>]

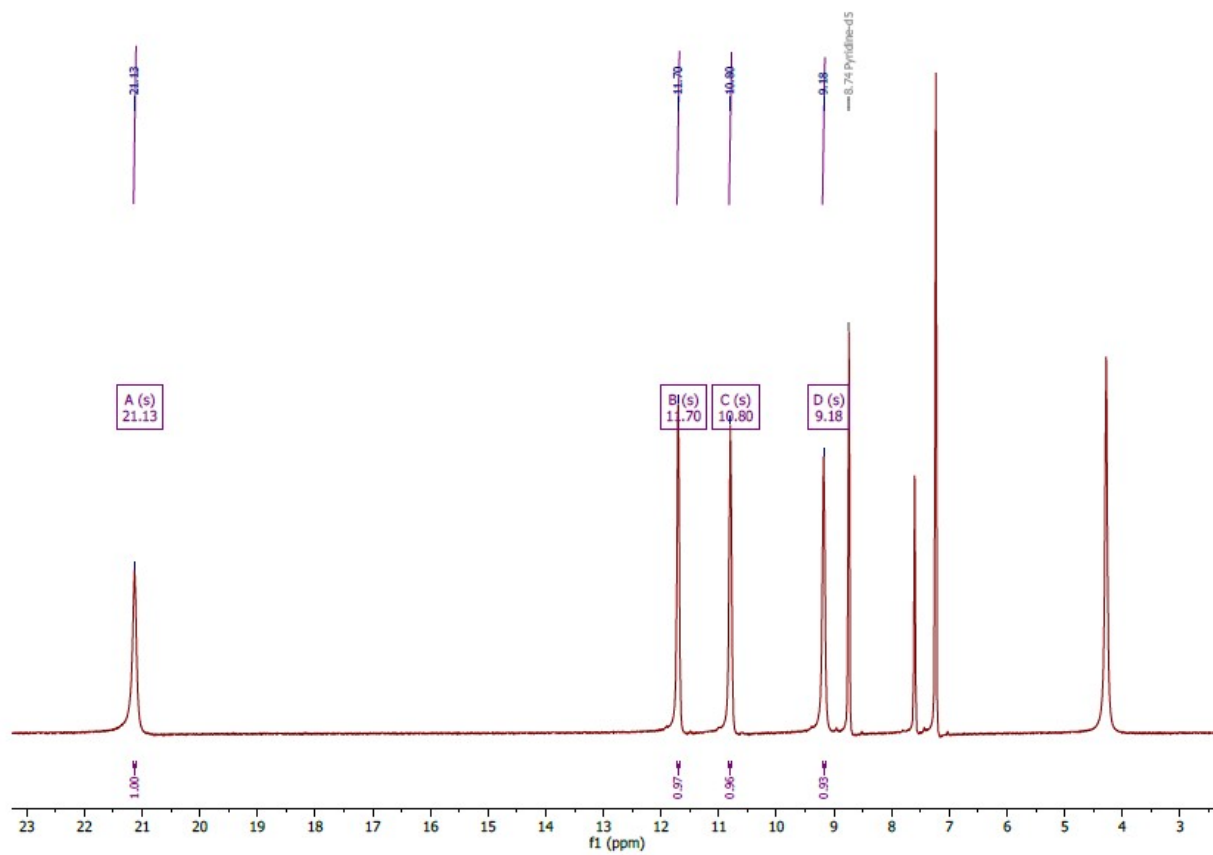

**Figure S16:** [Nd(mpo)<sub>2</sub>(μ-O-mpo)(H<sub>2</sub>O)]<sub>2</sub>

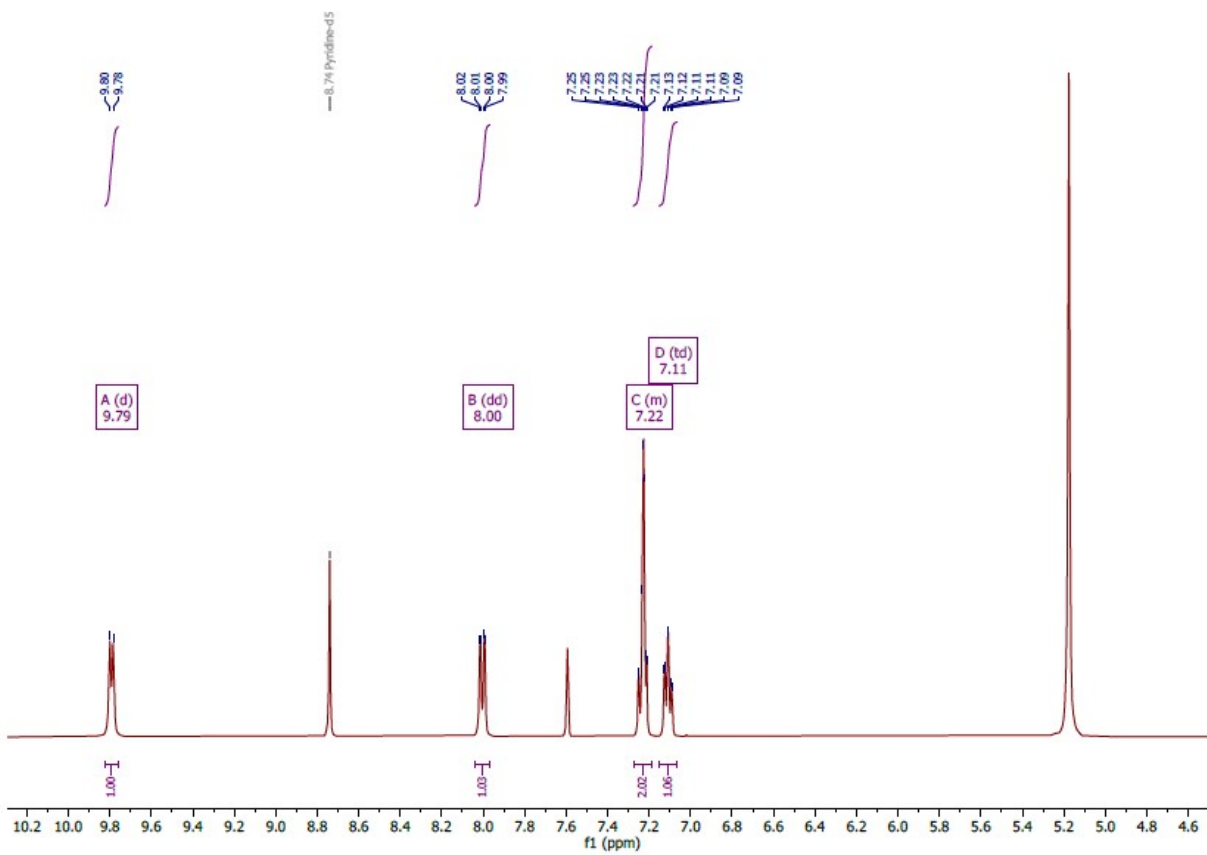

**Figure S17:**  $[\text{Sm}(\text{mpo})_2(\mu\text{-O-mpo})(\text{H}_2\text{O})]_2$

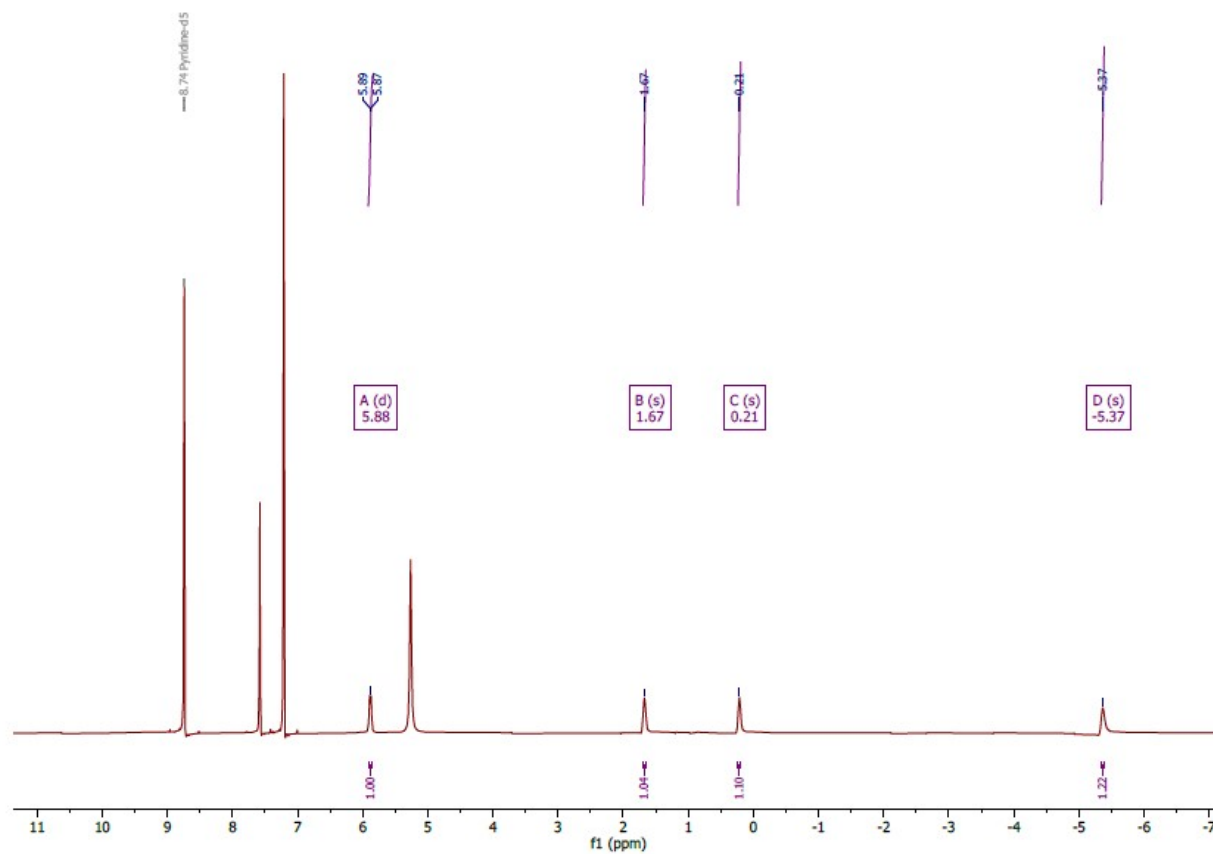

**Figure S18:**  $[\text{Eu}(\text{mpo})_2(\mu\text{-O-mpo})(\text{H}_2\text{O})]_2$



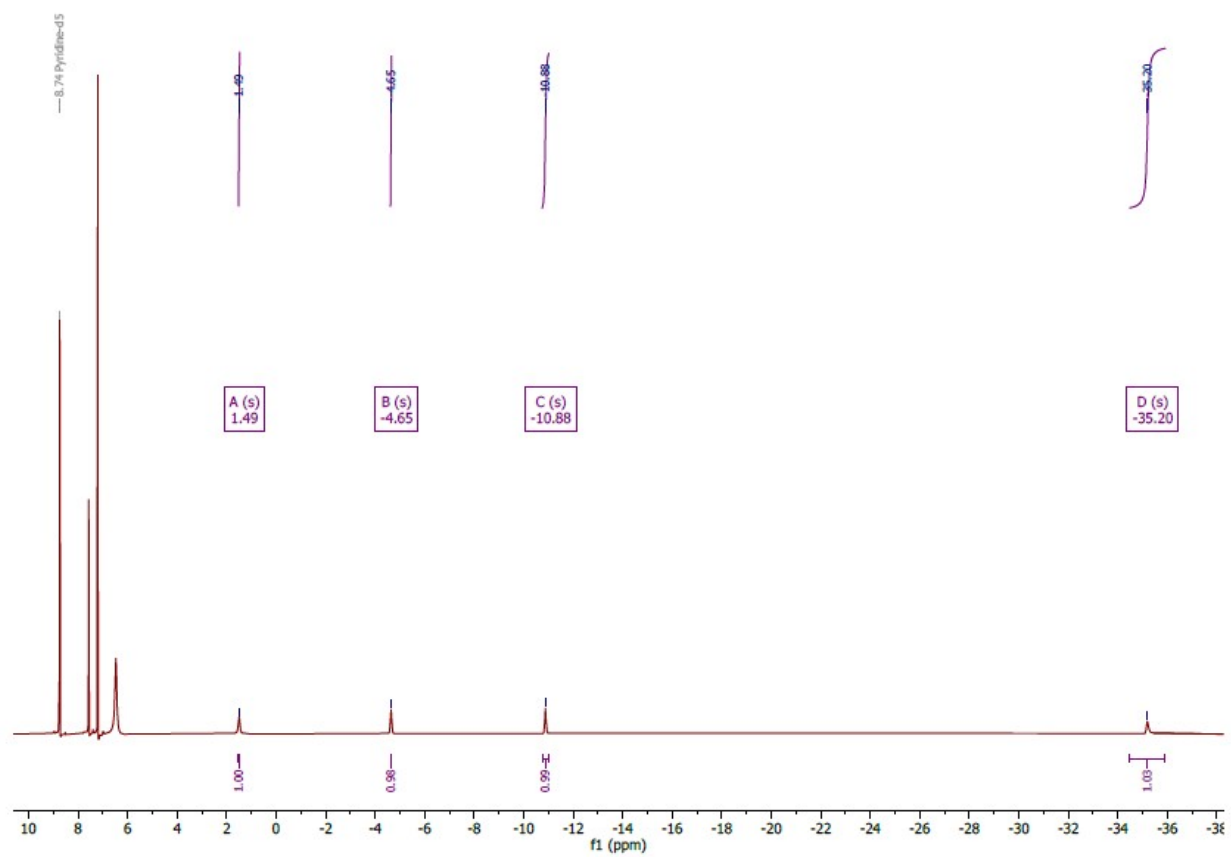

**Figure S19:** Yb(mpo)<sub>3</sub>(H<sub>2</sub>O)<sub>2</sub>•H<sub>2</sub>O

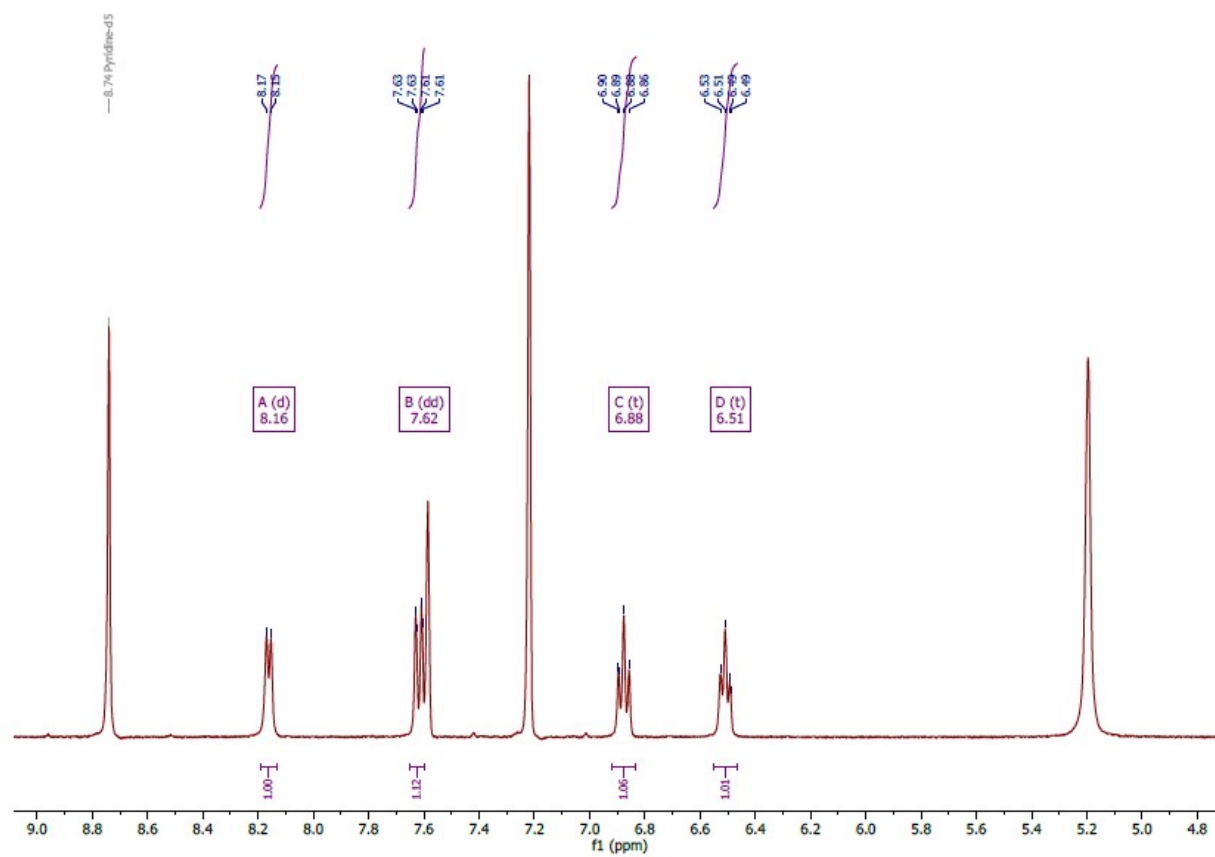

**Figure S20:**  $\text{Lu(mpo)}_3(\text{H}_2\text{O})_2 \cdot \text{H}_2\text{O}$

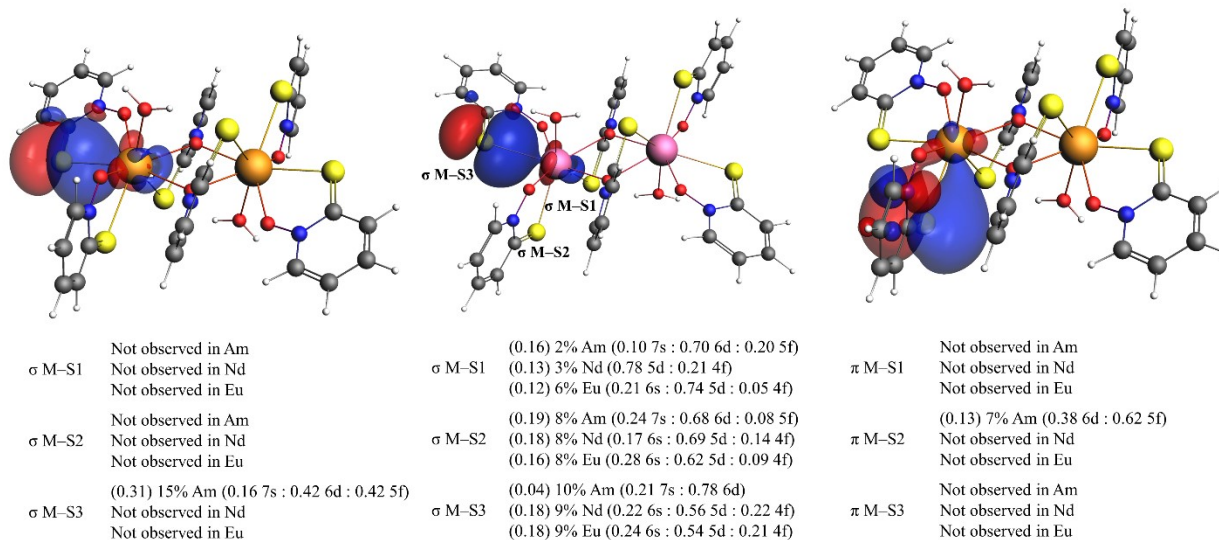

**Figure S21.** Selected natural localized molecular orbitals (NLMOs) showing the main metal – sulfur interactions. Metal contributions to the NLMOs are shown along with their hybrid contributions and contribution to the NLMO-BI (brackets).

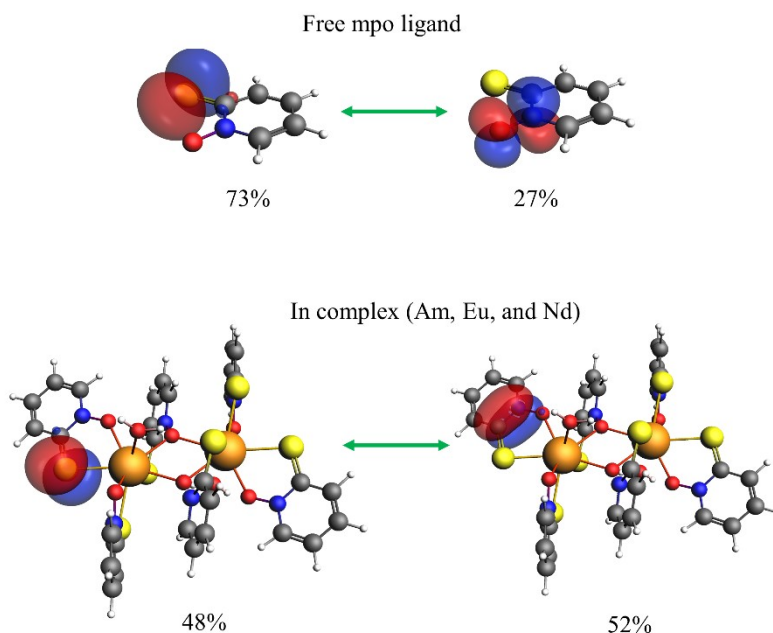

**Figure S22.** Selected hyperbonds (3-center 4-electron bonds) observed in the free mpo ligand and in complexes **1-Am**, **1-Eu**, and **1-Nd**. The orbitals shown correspond to the natural bond orbitals (NBOs) involved in hyperbonding ( $A + B-C \rightarrow A-B + :C$ ).

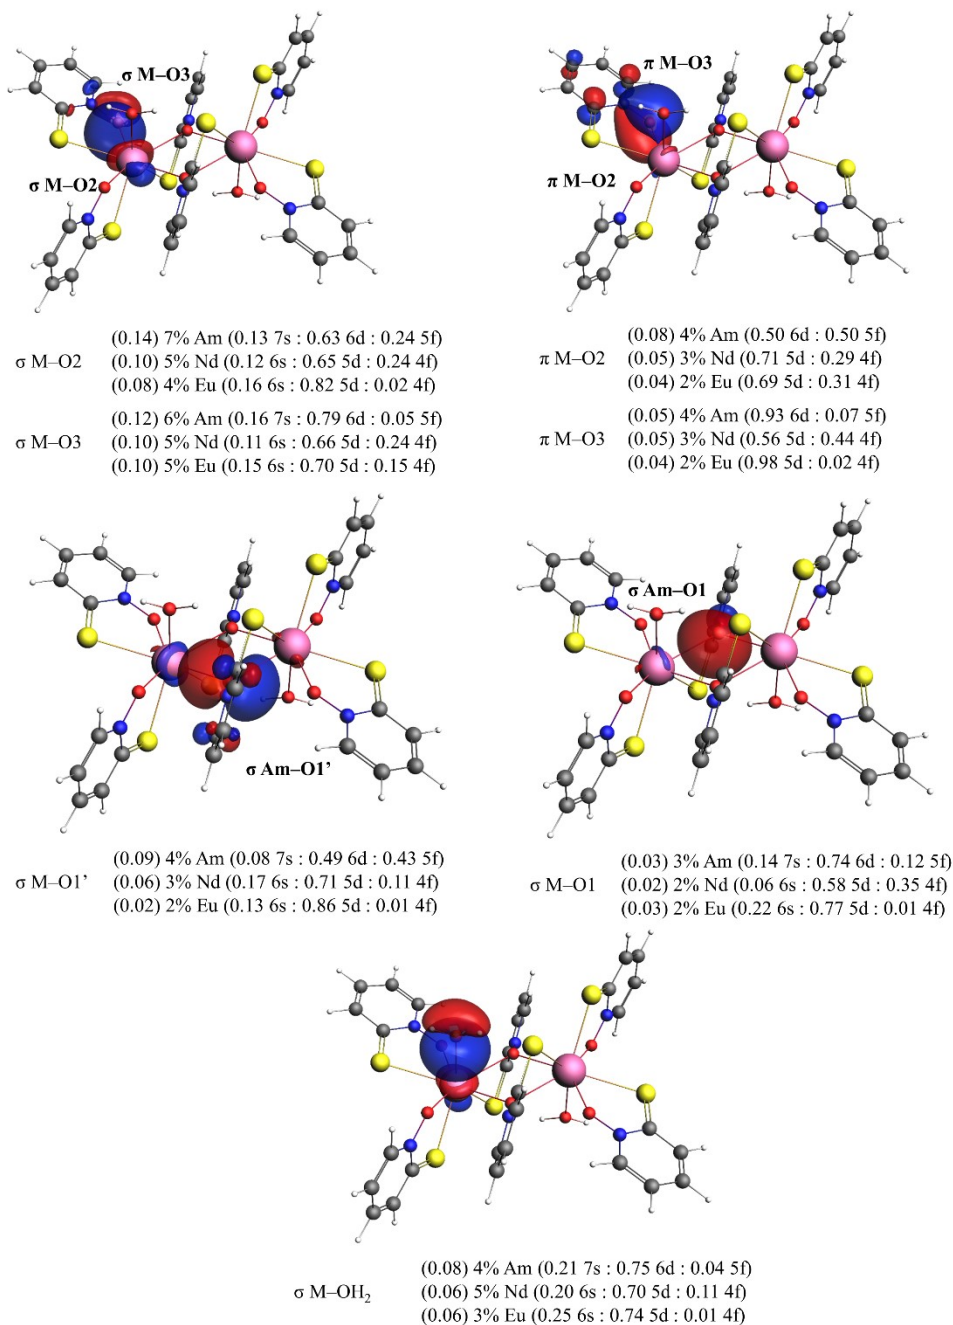

**Figure S23.** Selected natural localized molecular orbitals (NLMOs) showing the main metal – oxygen interactions. Metal contributions to the NLMOs are shown along with their hybrid contributions and contribution to the NLMO-BI (brackets).

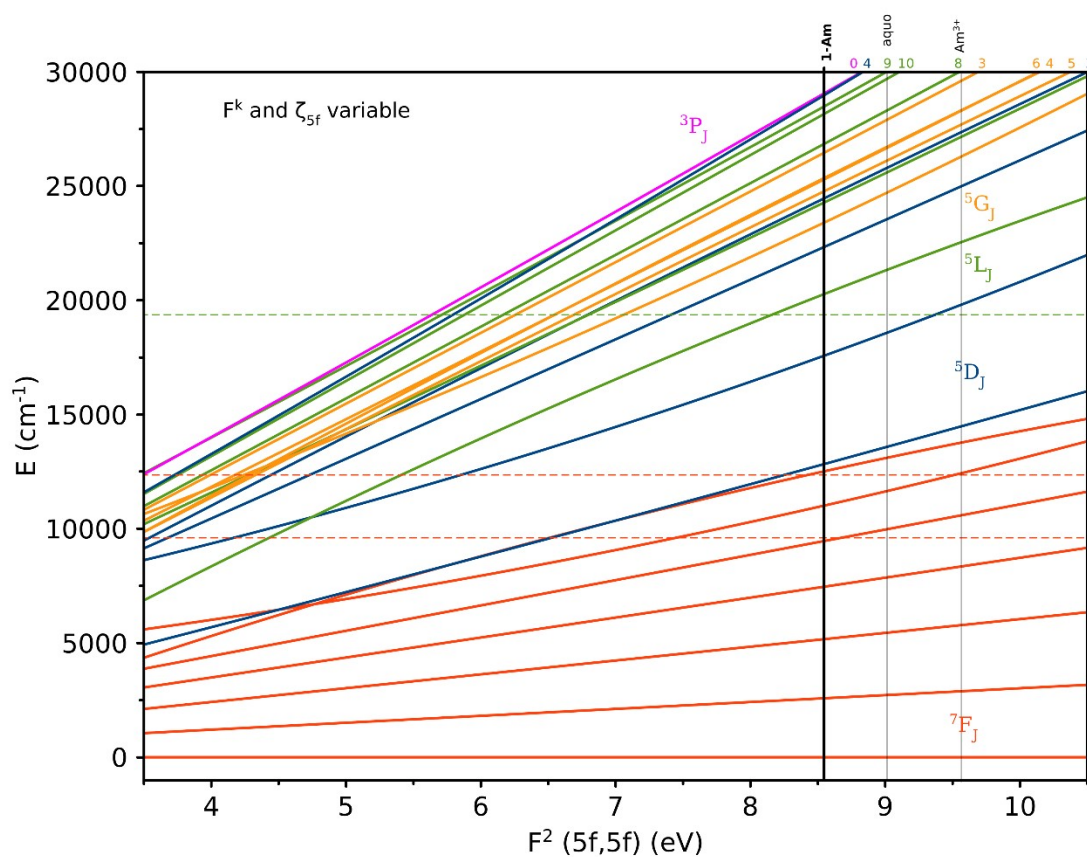

**Figure S24.** LFDFT energy levels of Am(III) as a function of  $F^k$  and  $\zeta_{5f}$  parameters. It was assumed that  $F^4$ ,  $F^6$ , and  $\zeta_{5f}$  are dependent functions of  $F^2$ . The vertical black line refers to the position of the electronic structure of **1-Am**, while grey vertical lines are shown as references for a nona-aquo and free  $\text{Am}^{3+}$  ions. For simplicity the Russell-Saunders notation has been used to label the nature of the ground and excited states.

**Table S30.** Wiberg (WBI) and Natural Localized Molecular Orbital bond indices (NLMO-BI). Labels correspond to the **1-Am** structure in **Figure 3**.

| M - L bond*     | WBI         |             |             | NLMO-BI     |             |             |
|-----------------|-------------|-------------|-------------|-------------|-------------|-------------|
|                 | <b>1-Nd</b> | <b>1-Eu</b> | <b>1-Am</b> | <b>1-Nd</b> | <b>1-Eu</b> | <b>1-Am</b> |
| S1              | 0.333       | 0.313       | 0.393       | 0.219       | 0.198       | 0.251       |
| S2              | 0.461       | 0.419       | 0.501       | 0.306       | 0.264       | 0.348       |
| S3              | 0.451       | 0.413       | 0.568       | 0.296       | 0.253       | 0.433       |
| O1              | 0.183       | 0.153       | 0.245       | 0.099       | 0.085       | 0.131       |
| O2              | 0.318       | 0.257       | 0.386       | 0.176       | 0.143       | 0.218       |
| O3              | 0.316       | 0.262       | 0.382       | 0.173       | 0.150       | 0.202       |
| O1'             | 0.185       | 0.154       | 0.248       | 0.105       | 0.086       | 0.147       |
| OH <sub>2</sub> | 0.186       | 0.163       | 0.226       | 0.090       | 0.080       | 0.101       |

**Table S31.** Selected mpo bond lengths of the free and in-complex geometries. The free mpo bond lengths correspond to those obtained by geometry optimization at the PBE/TZP level of theory.

| Bond | System      | Average distance |
|------|-------------|------------------|
| C–S  | <b>1-Am</b> | 1.723            |
|      | <b>1-Nd</b> | 1.711            |
|      | Free mpo    | 1.705            |
| C–N  | <b>1-Am</b> | 1.360            |
|      | <b>1-Nd</b> | 1.360            |
|      | Free mpo    | 1.440            |
| N–O  | <b>1-Am</b> | 1.347            |
|      | <b>1-Nd</b> | 1.333            |
|      | Free mpo    | 1.294            |

**Table S32.** Wiberg bond indices of the free and in-complex mpo. WBIs of complexed mpo correspond to average values of all coordinated mpo ligands.

| WBI | mpo   | <b>1-Nd</b> | <b>1-Am</b> | $\Delta\text{WBI}_{\text{mpo-1-Am}}$ | $\Delta\text{WBI}_{\text{1-Nd-1-Am}}$ |
|-----|-------|-------------|-------------|--------------------------------------|---------------------------------------|
| C-S | 1.394 | 1.276       | 1.273       | 0.121                                | 0.002                                 |
| C-N | 1.036 | 1.151       | 1.154       | -0.118                               | -0.003                                |
| N-O | 1.274 | 1.107       | 1.101       | 0.173                                | 0.007                                 |

**Table S33.** Average wavefunction composition of the low-lying states of **1-Am** calculated from LFDFT. Contributions < 5% were omitted.

| Relative energy (cm <sup>-1</sup> ) | J | Wavefunction composition                                     |
|-------------------------------------|---|--------------------------------------------------------------|
| 0                                   | 0 | 50% <sup>7</sup> F + 36% <sup>5</sup> D + 12% <sup>3</sup> P |
| 2,467 – 2,800                       | 1 | 68% <sup>7</sup> F + 27% <sup>5</sup> D                      |
| 5,064 – 5,517                       | 2 | 81% <sup>7</sup> F + 15% <sup>5</sup> D                      |
| 7,411 – 7,745                       | 3 | 86% <sup>7</sup> F + 6% <sup>5</sup> D                       |
| 9,100 – 9,926                       | 4 | 87% <sup>7</sup> F + 5% <sup>5</sup> D                       |
| 10,827 – 11,570                     | 5 | 82% <sup>7</sup> F + 10% <sup>5</sup> G + 5% <sup>5</sup> F  |
| 11,944 – 12,590                     | 6 | 72% <sup>7</sup> F + 21% <sup>5</sup> G                      |



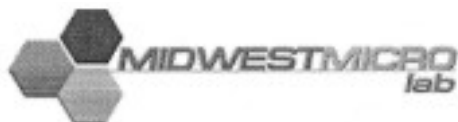

"Pr"

SAMPLE IDENTIFICATION ON Vial

Analysis Requested: CHN

Single ☐ Duplicate ☒ Triplicate ☐

| Analysis Requested | Customer Theory | <i>Office Use Only:<br/>Results are total % Found</i> |       |  |                                                                                                          |
|--------------------|-----------------|-------------------------------------------------------|-------|--|----------------------------------------------------------------------------------------------------------|
| C                  | 33.3%           | 32.98                                                 | 33.01 |  | <b>Molecular Formula:</b><br><b>Pr(C<sub>5</sub>H<sub>5</sub>NOS)<sub>3</sub>(H<sub>2</sub>O)</b>        |
| H                  | 3.1%            | 2.63                                                  | 2.69  |  |                                                                                                          |
| N                  | 7.8%            | 7.60                                                  | 7.59  |  |                                                                                                          |
|                    |                 |                                                       |       |  | <b>Air Sensitive/<br/>Glove Box:</b> YES <input type="checkbox"/> NO <input checked="" type="checkbox"/> |
|                    |                 |                                                       |       |  | <b>Hazardous/<br/>Explosive:</b> YES <input type="checkbox"/> NO <input checked="" type="checkbox"/>     |
|                    |                 |                                                       |       |  | <b>Hydroscopic:</b> YES <input type="checkbox"/> NO <input checked="" type="checkbox"/>                  |
|                    |                 |                                                       |       |  | <b>Vacuum Drying Requested:</b><br>Yes <input type="checkbox"/> No <input checked="" type="checkbox"/>   |
|                    |                 |                                                       |       |  | Temp: _____ °C<br>Time: ____ Hr. ____ Min.                                                               |
|                    |                 |                                                       |       |  | <b>Sample Return Address:</b><br>Yes <input type="checkbox"/> No <input checked="" type="checkbox"/>     |

Shipping address:  
 Midwest MicroLab  
 Attn: Valerie Guzzetta  
 7212 N. Shadeland Ave., Suite 110  
 Indianapolis, IN 46250  
 Phone: 317-849-6606  
 Fax: 317-849-8534  
 Email: info@midwestlab.com  
 Website: www.midwestlab.com

Submitter Comments:

Office Use Only

Please include 1 submission form per sample.

RECEIVED AUG 22 2022

We appreciate your business.

**Figure S25: CHN Analysis of 1-Pr.**

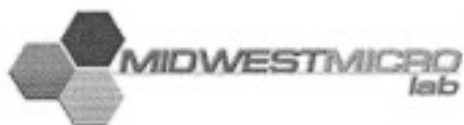

"Nd"

SAMPLE IDENTIFICATION ON Vial

Analysis Requested: CHN

Single ☐ Duplicate ☒ Triplicate ☐

| Analysis Requested | Customer Theory | Office Use Only:<br>Results are total % Found |       |  | Molecular Formula:                     | Nd(C <sub>5</sub> H <sub>5</sub> NOS) <sub>3</sub> (H <sub>2</sub> O) |
|--------------------|-----------------|-----------------------------------------------|-------|--|----------------------------------------|-----------------------------------------------------------------------|
| C                  | 33.1%           | 33.48                                         | 33.35 |  | Air Sensitive/<br>Glove Box:           | YES <input type="checkbox"/> NO <input checked="" type="checkbox"/>   |
| H                  | 3.1%            | 2.57                                          | 2.27  |  | Hazardous/<br>Explosive:               | YES <input type="checkbox"/> NO <input checked="" type="checkbox"/>   |
| N                  | 7.7%            | 7.69                                          | 7.32  |  | Hydroscopic:                           | YES <input type="checkbox"/> NO <input checked="" type="checkbox"/>   |
|                    |                 |                                               |       |  | Vacuum Drying Requested:               | Temp: _____ °C                                                        |
|                    |                 |                                               |       |  | Yes <input type="checkbox"/>           | Time: ____ Hr, ____ Min.                                              |
|                    |                 |                                               |       |  | No <input checked="" type="checkbox"/> |                                                                       |
|                    |                 |                                               |       |  | Sample Return Address:                 |                                                                       |
|                    |                 |                                               |       |  | Yes <input type="checkbox"/>           |                                                                       |
|                    |                 |                                               |       |  | No <input checked="" type="checkbox"/> |                                                                       |

Shipping address:  
Midwest MicroLab  
Attn: Valerie Guozetta  
7212 N. Shadeland Ave., Suite 110  
Indianapolis, IN 46250  
Phone: 317-849-6606  
Fax: 317-849-8534  
Email: info@midwestlab.com  
Website: www.midwestlab.com

Submitter Comments:

Office Use Only

Please include 2 submission form per sample.

RECEIVED AUG 22 2022

We appreciate your business.

Figure S26: CHN Analysis of 1-Nd.

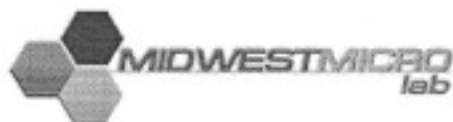

"Sm"

SAMPLE IDENTIFICATION ON Vial

Analysis Requested: CHN

Single ☐ Duplicate ☒ Triplicate ☐

| Analysis Requested | Customer Theory | Office Use Only:<br>Results are total % Found |       |  | Molecular Formula:                     | Sm(C <sub>5</sub> H <sub>5</sub> NOS) <sub>3</sub><br>(H <sub>2</sub> O) |
|--------------------|-----------------|-----------------------------------------------|-------|--|----------------------------------------|--------------------------------------------------------------------------|
| C                  | 32.7%           | 32.85                                         | 33.05 |  | Air Sensitive/<br>Glove Box:           | YES <input type="checkbox"/> NO <input checked="" type="checkbox"/>      |
| H                  | 3.1%            | 2.53                                          | 2.59  |  | Hazardous/<br>Explosive:               | YES <input type="checkbox"/> NO <input checked="" type="checkbox"/>      |
| N                  | 7.6%            | 7.54                                          | 7.54  |  | Hydroscopic:                           | YES <input type="checkbox"/> NO <input checked="" type="checkbox"/>      |
|                    |                 |                                               |       |  | Vacuum Drying<br>Requested:            | Temp: _____ °C                                                           |
|                    |                 |                                               |       |  | Yes <input type="checkbox"/>           | Time: ____ Hr. ____ Min.                                                 |
|                    |                 |                                               |       |  | No <input checked="" type="checkbox"/> |                                                                          |
|                    |                 |                                               |       |  | Sample Return<br>Address:              |                                                                          |
|                    |                 |                                               |       |  | Yes <input type="checkbox"/>           |                                                                          |
|                    |                 |                                               |       |  | No <input checked="" type="checkbox"/> |                                                                          |

Shipping address:  
Midwest MicroLab  
Attn: Valerie Guzzetta  
7212 N. Shadeland Ave., Suite 110  
Indianapolis, IN 46250  
Phone: 317-849-6606  
Fax: 317-849-8534  
Email: info@midwestlab.com  
Website: www.midwestlab.com

Submitter Comments:

Office Use Only

Please include 1 submission form per sample.

RECEIVED AUG 22 2022

We appreciate your business.

Figure S27: CHN Analysis of 1-Sm.

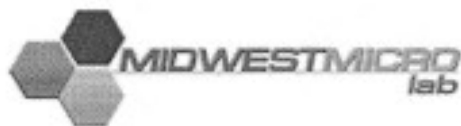

"Eu"

SAMPLE IDENTIFICATION ON Vial

Analysis Requested: CHN

Single ☐ Duplicate ☒ Triplicate ☐

| Analysis Requested | Customer Theory | Office Use Only:<br>Results are total % Found |    |  | Molecular Formula:                                                                               |
|--------------------|-----------------|-----------------------------------------------|----|--|--------------------------------------------------------------------------------------------------|
| C                  | 32.7%           | 35.39                                         | ** |  | Eu(C <sub>5</sub> H <sub>5</sub> NOS) <sub>3</sub> (H <sub>2</sub> O)                            |
| H                  | 3.1%            | 3.09                                          |    |  | Air Sensitive/<br>Glove Box: YES <input type="checkbox"/> NO <input checked="" type="checkbox"/> |
| N                  | 7.6%            | 7.94                                          |    |  | Hazardous/<br>Explosives: YES <input type="checkbox"/> NO <input checked="" type="checkbox"/>    |
|                    |                 |                                               |    |  | Hydroscopic: YES <input type="checkbox"/> NO <input checked="" type="checkbox"/>                 |
|                    |                 |                                               |    |  | Vacuum Drying Requested:<br>Yes <input type="checkbox"/> No <input checked="" type="checkbox"/>  |
|                    |                 |                                               |    |  | Temp: _____ °C<br>Time: ____ Hr. ____ Min.                                                       |
|                    |                 |                                               |    |  | Sample Return Address:<br>Yes <input type="checkbox"/> No <input checked="" type="checkbox"/>    |

Shipping address:  
Midwest Micro Lab  
Attn: Valerie Guzzetta  
7212 N. Shadeland Ave., Suite 110  
Indianapolis, IN 46250  
Phone: 317-849-6606  
Fax: 317-849-8534  
Email: info@midwestlab.com  
Website: www.midwestlab.com

Submitter Comments:

Office Use Only

\*\* Sample lid was not screwed on and the sample leaked all over.  
Only 0.794 mg of sample was viable in the vial. \*\*

Please include 1 submission form per sample.

RECEIVED AUG 22 2022

We appreciate your business.

Figure S28: CHN Analysis of 1-Eu.

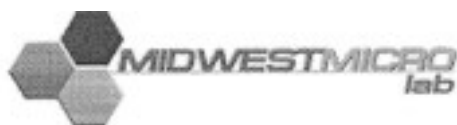

"Gd"

SAMPLE IDENTIFICATION ON Vial

Analysis Requested: CHN

Single ☐ Duplicate ☒ Triplicate ☐

| Analysis Requested | Customer Theory | Office Use Only:<br>Results are total % Found |       |  | Molecular Formula:                     | Gd(C <sub>5</sub> H <sub>5</sub> NOS) <sub>3</sub><br>(H <sub>2</sub> O) |
|--------------------|-----------------|-----------------------------------------------|-------|--|----------------------------------------|--------------------------------------------------------------------------|
| C                  | 32.3%           | 31.70                                         | 31.66 |  | Air Sensitive/<br>Glove Box:           | YES <input type="checkbox"/> NO <input checked="" type="checkbox"/>      |
| H                  | 3.1%            | 2.56                                          | 2.74  |  | Hazardous/<br>Explosive:               | YES <input type="checkbox"/> NO <input checked="" type="checkbox"/>      |
| N                  | 7.5%            | 7.25                                          | 6.96  |  | Hydroscopic:                           | YES <input type="checkbox"/> NO <input checked="" type="checkbox"/>      |
|                    |                 |                                               |       |  | Vacuum Drying<br>Requested:            | Temp: _____ °C                                                           |
|                    |                 |                                               |       |  | Yes <input type="checkbox"/>           | Time: ____ Hr. ____ Min.                                                 |
|                    |                 |                                               |       |  | No <input checked="" type="checkbox"/> |                                                                          |
|                    |                 |                                               |       |  | Sample Return<br>Address:              |                                                                          |
|                    |                 |                                               |       |  | Yes <input type="checkbox"/>           |                                                                          |
|                    |                 |                                               |       |  | No <input checked="" type="checkbox"/> |                                                                          |

Shipping address:  
Midwest MicroLab  
Attn: Valerie Guzzetta  
7212 N. Shadeland Ave., Suite 110  
Indianapolis, IN 46250  
Phone: 317-849-6606  
Fax: 317-849-8534  
Email: info@midwestlab.com  
Website: www.midwestlab.com

Submitter Comments:

Office Use Only

Please include 1 submission form per sample.

RECEIVED AUG 22 2022

We appreciate your business.

Figure S29: CHN Analysis of 1-Gd.

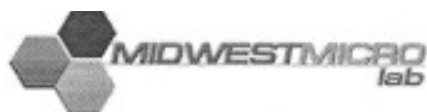

"Tb"

SAMPLE IDENTIFICATION ON Vial

Analysis Requested: CHN

Single ☐ Duplicate ☒ Triplicate ☐

| Analysis Requested | Customer Theory | Office Use Only:<br>Results are total % Found |       |  | Molecular Formula:                      | Tb(C <sub>5</sub> H <sub>5</sub> NOS) <sub>3</sub> (H <sub>2</sub> O) |
|--------------------|-----------------|-----------------------------------------------|-------|--|-----------------------------------------|-----------------------------------------------------------------------|
| C                  | 32.3%           | 32.17                                         | 32.48 |  | Air Sensitive/<br>Glove Box:            | YES <input type="checkbox"/> NO <input checked="" type="checkbox"/>   |
| H                  | 3.1%            | 2.44                                          | 2.50  |  | Hazardous/<br>Explosive:                | YES <input type="checkbox"/> NO <input checked="" type="checkbox"/>   |
| N                  | 7.5%            | 7.47                                          | 7.51  |  | Hydroscopic:                            | YES <input type="checkbox"/> NO <input checked="" type="checkbox"/>   |
|                    |                 |                                               |       |  | Vacuum Drying<br>Requested:             | Temp: 25 °C                                                           |
|                    |                 |                                               |       |  | Yes <input checked="" type="checkbox"/> | Time: 2 Hr. Min.                                                      |
|                    |                 |                                               |       |  | No <input checked="" type="checkbox"/>  |                                                                       |
|                    |                 |                                               |       |  | Sample Return<br>Address:               |                                                                       |
|                    |                 |                                               |       |  | Yes <input type="checkbox"/>            |                                                                       |
|                    |                 |                                               |       |  | No <input checked="" type="checkbox"/>  |                                                                       |

Shipping address:  
Midwest Micro Lab  
Attn: Valerie Guzzetta  
7212 N. Shadeland Ave., Suite 110  
Indianapolis, IN 46250  
Phone: 317-849-6606  
Fax: 317-849-8534  
Email: info@midwestlab.com  
Website: www.midwestlab.com

Submitter Comments:

**Sample may be wet, please pull vacuum without heat.**

Office Use Only

Please include 1 submission form per sample.

RECEIVED AUG 22 2022

We appreciate your business.

**Figure S30: CHN Analysis of 1-Tb.**

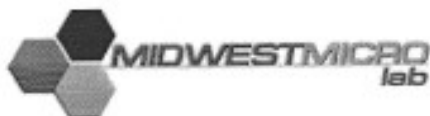

"Dy"

SAMPLE IDENTIFICATION ON Vial

Analysis Requested: CHN

Single ☐ Duplicate ☒ Triplicate ☐

| Analysis Requested | Customer Theory | Office Use Only:<br>Results are total % Found |       |  | Molecular Formula:                     | Dy(C <sub>5</sub> H <sub>5</sub> NOS) <sub>3</sub> (H <sub>2</sub> O) <sub>2</sub> |
|--------------------|-----------------|-----------------------------------------------|-------|--|----------------------------------------|------------------------------------------------------------------------------------|
| C                  | 31.2%           | 30.78                                         | 31.00 |  | Air Sensitive/<br>Glove Box:           | YES <input type="checkbox"/> NO <input checked="" type="checkbox"/>                |
| H                  | 3.3%            | 3.21                                          | 3.08  |  | Hazardous/<br>Explosive:               | YES <input type="checkbox"/> NO <input checked="" type="checkbox"/>                |
| N                  | 7.3%            | 6.98                                          | 7.02  |  | Hydroscopic:                           | YES <input type="checkbox"/> NO <input checked="" type="checkbox"/>                |
|                    |                 |                                               |       |  | Vacuum Drying Requested:               | Temp: _____ °C                                                                     |
|                    |                 |                                               |       |  | Yes <input type="checkbox"/>           | Time: ____ Hr. ____ Min.                                                           |
|                    |                 |                                               |       |  | No <input checked="" type="checkbox"/> |                                                                                    |
|                    |                 |                                               |       |  | Sample Return Address:                 |                                                                                    |
|                    |                 |                                               |       |  | Yes <input type="checkbox"/>           |                                                                                    |
|                    |                 |                                               |       |  | No <input checked="" type="checkbox"/> |                                                                                    |

Shipping address:  
Midwest MicroLab  
Attn: Valerie Guzzetta  
7212 N. Shadeland Ave., Suite 110  
Indianapolis, IN 46250  
Phone: 317-849-6606  
Fax: 317-849-8534  
Email: info@midwestlab.com  
Website: www.midwestlab.com

Submitter Comments:

Office Use Only

Please include 1 submission form per sample.

RECEIVED AUG 22 2022

We appreciate your business.

Figure S31: CHN Analysis of 2-Dy.

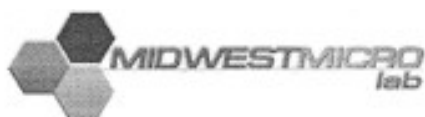

"Ho"  
SAMPLE IDENTIFICATION ON Vial

Analysis Requested: CHN

Single ☐ Duplicate ☒ Triplicate ☐

| Analysis Requested | Customer Theory | Office Use Only:<br>Results are total % Found |       |  |
|--------------------|-----------------|-----------------------------------------------|-------|--|
| C                  | 30.1%           | 30.14                                         | 30.99 |  |
| H                  | 3.3%            | 2.92                                          | 3.29  |  |
| N                  | 7.2%            | 6.92                                          | 6.76  |  |
|                    |                 |                                               |       |  |
|                    |                 |                                               |       |  |
|                    |                 |                                               |       |  |
|                    |                 |                                               |       |  |
|                    |                 |                                               |       |  |
|                    |                 |                                               |       |  |

|                                        |                                                                                    |
|----------------------------------------|------------------------------------------------------------------------------------|
| Molecular Formula:                     | Ho(C <sub>5</sub> H <sub>5</sub> NOS) <sub>3</sub> (H <sub>2</sub> O) <sub>2</sub> |
| Air Sensitive/<br>Glove Box:           | YES <input type="checkbox"/> NO <input checked="" type="checkbox"/>                |
| Hazardous/<br>Explosive:               | YES <input type="checkbox"/> NO <input checked="" type="checkbox"/>                |
| Hydroscopic:                           | YES <input type="checkbox"/> NO <input checked="" type="checkbox"/>                |
| Vacuum Drying<br>Requested:            | Temp: _____ °C                                                                     |
| Yes <input type="checkbox"/>           | Time: ____ Hr. ____ Min.                                                           |
| No <input checked="" type="checkbox"/> |                                                                                    |
| Sample Return<br>Address:              |                                                                                    |
| Yes <input type="checkbox"/>           |                                                                                    |
| No <input checked="" type="checkbox"/> |                                                                                    |

Shipping address:  
Midwest MicroLab  
Attn: Valerie Guzzetta  
7212 N. Shadeland Ave., Suite 110  
Indianapolis, IN 46250  
Phone: 317-849-6606  
Fax: 317-849-8534  
Email: info@midwestlab.com  
Website: www.midwestlab.com

Submitter Comments:

Office Use Only

Please include 1 submission form per sample.

RECEIVED AUG 22 2022

We appreciate your business.

Figure S32: CHN Analysis of 2-Ho.



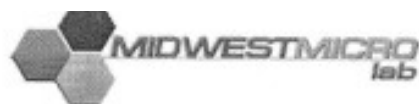

"Er"

SAMPLE IDENTIFICATION ON Vial

Analysis Requested: CHN

Single ☐ Duplicate ☒ Triplicate ☐

| Analysis Requested | Customer Theory | Office Use Only:<br>Results are total % Found |       |  | Molecular Formula:                     | Er(C <sub>5</sub> H <sub>5</sub> NOS) <sub>3</sub> (H <sub>2</sub> O) <sub>2</sub> |
|--------------------|-----------------|-----------------------------------------------|-------|--|----------------------------------------|------------------------------------------------------------------------------------|
| C                  | 30.8%           | 30.49                                         | 30.25 |  | Air Sensitive/<br>Glove Box:           | YES <input type="checkbox"/> NO <input checked="" type="checkbox"/>                |
| H                  | 3.3%            | 2.93                                          | 2.92  |  | Hazardous/<br>Explosive:               | YES <input type="checkbox"/> NO <input checked="" type="checkbox"/>                |
| N                  | 7.2%            | 6.96                                          | 6.93  |  | Hydroscopic:                           | YES <input type="checkbox"/> NO <input checked="" type="checkbox"/>                |
|                    |                 |                                               |       |  | Vacuum Drying<br>Requested:            | Temp: _____ °C                                                                     |
|                    |                 |                                               |       |  | Yes <input type="checkbox"/>           | Time: ____ Hr. ____ Min.                                                           |
|                    |                 |                                               |       |  | No <input checked="" type="checkbox"/> |                                                                                    |
|                    |                 |                                               |       |  | Sample Return<br>Address:              |                                                                                    |
|                    |                 |                                               |       |  | Yes <input type="checkbox"/>           |                                                                                    |
|                    |                 |                                               |       |  | No <input checked="" type="checkbox"/> |                                                                                    |

Shipping address:  
Midwest MicroLab  
Attn: Valerie Guzzetta  
7212 N. Shadeland Ave., Suite 110  
Indianapolis, IN 46250  
Phone: 317-849-6606  
Fax: 317-849-8534  
Email: info@midwestlab.com  
Website: www.midwestlab.com

Submitter Comments:

Office Use Only

Please include 1 submission form per sample.

RECEIVED AUG 22 2022

We appreciate your business.

Figure S33: CHN Analysis of 2-Er.

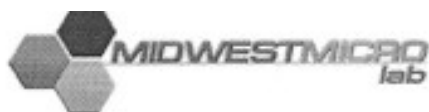

"Tm"

SAMPLE IDENTIFICATION ON Vial

Analysis Requested: CHN

Single ☐ Duplicate ☒ Triplicate ☐

| Analysis Requested | Customer Theory | Office Use Only:<br>Results are total % Found |       |  | Molecular Formula:                     | Tm(C <sub>5</sub> H <sub>5</sub> NOS) <sub>3</sub><br>(H <sub>2</sub> O) <sub>2</sub> |
|--------------------|-----------------|-----------------------------------------------|-------|--|----------------------------------------|---------------------------------------------------------------------------------------|
| C                  | 30.7%           | 30.82                                         | 30.56 |  | Air Sensitive/<br>Glove Box:           | YES <input type="checkbox"/> NO <input checked="" type="checkbox"/>                   |
| H                  | 3.3%            | 2.89                                          | 2.96  |  | Hazardous/<br>Explosive:               | YES <input type="checkbox"/> NO <input checked="" type="checkbox"/>                   |
| N                  | 7.2%            | 7.02                                          | 6.86  |  | Hydroscopic:                           | YES <input type="checkbox"/> NO <input checked="" type="checkbox"/>                   |
|                    |                 |                                               |       |  | Vacuum Drying<br>Requested:            | Temp: _____ °C                                                                        |
|                    |                 |                                               |       |  | Yes <input type="checkbox"/>           | Time: ____ Hr. ____ Min.                                                              |
|                    |                 |                                               |       |  | No <input checked="" type="checkbox"/> |                                                                                       |
|                    |                 |                                               |       |  | Sample Return<br>Address:              |                                                                                       |
|                    |                 |                                               |       |  | Yes <input type="checkbox"/>           |                                                                                       |
|                    |                 |                                               |       |  | No <input checked="" type="checkbox"/> |                                                                                       |

Shipping address:  
Midwest Micro Lab  
Attn: Valerie Guzzetta  
7212 N. Shadeland Ave., Suite 110  
Indianapolis, IN 46250  
Phone: 317-849-6606  
Fax: 317-849-8534  
Email: info@midwestlab.com  
Website: www.midwestlab.com

Submitter Comments:

Office Use Only

Please include 1 submission form per sample.

RECEIVED AUG 22 2022

We appreciate your business.

Figure S34: CHN Analysis of 2-Tm.

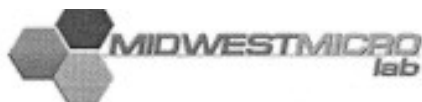

"Yb"

SAMPLE IDENTIFICATION ON Vial

Analysis Requested: CHN

Single ☐ Duplicate ☒ Triplicate ☐

| Analysis Requested | Customer Theory | Office Use Only:<br>Results are total % Found |       |  |
|--------------------|-----------------|-----------------------------------------------|-------|--|
| C                  | 30.5%           | 30.02                                         | 30.15 |  |
| H                  | 3.2%            | 3.02                                          | 2.98  |  |
| N                  | 7.1%            | 6.95                                          | 6.87  |  |
|                    |                 |                                               |       |  |
|                    |                 |                                               |       |  |
|                    |                 |                                               |       |  |
|                    |                 |                                               |       |  |
|                    |                 |                                               |       |  |

|                                        |                                                                                    |
|----------------------------------------|------------------------------------------------------------------------------------|
| Molecular Formula:                     | Yb(C <sub>5</sub> H <sub>5</sub> NOS) <sub>3</sub> (H <sub>2</sub> O) <sub>2</sub> |
| Air Sensitive/<br>Glove Box:           | YES <input type="checkbox"/> NO <input checked="" type="checkbox"/>                |
| Hazardous/<br>Explosive:               | YES <input type="checkbox"/> NO <input checked="" type="checkbox"/>                |
| Hydroscopic:                           | YES <input type="checkbox"/> NO <input checked="" type="checkbox"/>                |
| Vacuum Drying Requested:               | Temp: _____ °C                                                                     |
| Yes <input type="checkbox"/>           | Time: ____ Hr. ____ Min.                                                           |
| No <input checked="" type="checkbox"/> |                                                                                    |
| Sample Return Address:                 |                                                                                    |
| Yes <input type="checkbox"/>           |                                                                                    |
| No <input checked="" type="checkbox"/> |                                                                                    |

Shipping address:  
Midwest MicroLab  
Attn: Valerie Guzzetta  
7212 N. Shadeland Ave., Suite 110  
Indianapolis, IN 46250  
Phone: 317-849-6606  
Fax: 317-849-8534  
Email: info@midwestlab.com  
Website: www.midwestlab.com

Submitter Comments:

Office Use Only

Please include 1 submission form per sample.

We appreciate your business.

RECEIVED AUG 22 2022

Figure S35: CHN Analysis of 2-Yb.

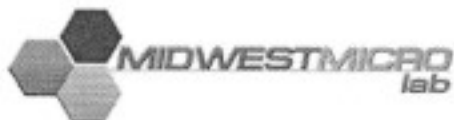

"Lu"

SAMPLE IDENTIFICATION ON Vial

Analysis Requested: CHN

Single ☐ Duplicate ☒ Triplicate ☐

| Analysis Requested | Customer Theory | Office Use Only:<br>Results are total % Found |       |  | Molecular Formula:                     | Lu(C <sub>5</sub> H <sub>5</sub> NOS) <sub>3</sub> (H <sub>2</sub> O) <sub>2</sub> |
|--------------------|-----------------|-----------------------------------------------|-------|--|----------------------------------------|------------------------------------------------------------------------------------|
| C                  | 30.4%           | 30.22                                         | 30.36 |  | Air Sensitive/<br>Glove Box:           | YES <input type="checkbox"/> NO <input checked="" type="checkbox"/>                |
| H                  | 3.2%            | 2.91                                          | 2.92  |  | Hazardous/<br>Explosive:               | YES <input type="checkbox"/> NO <input checked="" type="checkbox"/>                |
| N                  | 7.1%            | 6.97                                          | 6.76  |  | Hydroscopic:                           | YES <input type="checkbox"/> NO <input checked="" type="checkbox"/>                |
|                    |                 |                                               |       |  | Vacuum Drying<br>Requested:            | Temp: _____ °C                                                                     |
|                    |                 |                                               |       |  | Yes <input type="checkbox"/>           | Time: ____ Hr. ____ Min.                                                           |
|                    |                 |                                               |       |  | No <input checked="" type="checkbox"/> |                                                                                    |
|                    |                 |                                               |       |  | Sample Return<br>Address:              |                                                                                    |
|                    |                 |                                               |       |  | Yes <input type="checkbox"/>           |                                                                                    |
|                    |                 |                                               |       |  | No <input checked="" type="checkbox"/> |                                                                                    |

Shipping address:  
Midwest Micro Lab  
Attn: Valerie Guzzetta  
7212 N. Shadeland Ave., Suite 110  
Indianapolis, IN 46250  
Phone: 317-849-6606  
Fax: 317-849-8534  
Email: info@midwestlab.com  
Website: www.midwestlab.com

Submitter Comments:

Office Use Only

Please include 1 submission form per sample.

RECEIVED AUG 22 2022

We appreciate your business.

Figure S36: CHN Analysis of 2-Lu.

## **References**

- 1 APEX3. Bruker AXS, Inc.: Madison, WI 2017.
- 2 Sheldrick, G. M. Crystal Structure Refinement with SHELXL. *Acta Crystallogr. C* 2015, **71**, 3-8.
- 3 Sheldrick, G. M. SHELXT - Integrated Space-Group and Crystal-Structure Determination. *Acta Crystallogr. A* 2015, **71**, 3-8.
- 4 G. te Velde, F. M. Bickelhaupt, E. J. Baerends, C. Fonseca Guerra, S. J. A. van Gisbergen, J. G. Snijders and T. Ziegler, *J Comp. Chem.* 2001, **22**, 931–967.
- 5 Lenthe, E. van; Baerends, E. J.; Snijders, J. G. Relativistic Regular Two-component Hamiltonians. *J. Chem. Phys.* 1993, **99**, 4597–4610.
- 6 Glendening, E. D.; Landis, C. R.; Weinhold, F. NBO 6.0 : Natural Bond Orbital Analysis Program. *J. Comput. Chem.* 2013, **34**, 1429–1437.
- 7 Ramanantoanina, H.; Urland, W.; Cimpoesu, F.; Daul, C. *Phys. Chem. Chem. Phys.* 2013, **15**, 13902-13910.
- 8 Binnemans, K.; Srrler-Walrand, C. G. *Chem. Phys. Lett.* **1995**, 235, 163–174.
- 9 Liu, G. K.; Jensen, M. P.; Almond, P. M. *J. Phys. Chem. A* **2006**, 110 (6), 2081–2088.
